# 1 ***Clostridium difficile* colonizes alternative nutrient** 2 **niches during infection across distinct murine gut** 3 **microbiomes**

4 **Authors:** Matthew L. Jenior, Jhansi L. Leslie, Vincent B. Young, and Patrick D. Schloss\*

## 5 **Abstract**

6 *Clostridium difficile* is the largest single cause of hospital-acquired infection in the  
7 United States. A major risk factor for *Clostridium difficile* infection (CDI) is prior  
8 exposure to antibiotics, as they disrupt the gut bacterial community which protects from  
9 *C. difficile* colonization. Multiple antibiotic classes have been associated with CDI  
10 susceptibility; many leading to distinct community structures stemming from variation in  
11 bacterial targets of action. These microbiomes present separate metabolic challenges to  
12 *C. difficile*, therefore we hypothesized that the pathogen adapts its physiology to  
13 available nutrients within different gut environments. Utilizing an *in vivo* CDI model, we  
14 demonstrated *C. difficile* highly colonized ceca of mice pretreated with any of three  
15 antibiotics from distinct classes. Levels of *C. difficile* spore formation and toxin activity  
16 varied between animals based on the antibiotic administered. These physiologic  
17 processes in *C. difficile* are partially regulated by environmental nutrient concentrations.  
18 To investigate metabolic responses of the bacterium *in vivo*, we performed  
19 transcriptomic analysis of *C. difficile* from ceca of infected mice across pretreatments.  
20 This revealed heterogeneous expression in numerous catabolic pathways for diverse

21 growth substrates. To assess which resources *C. difficile* exploited, we developed a  
22 genome-scale metabolic model with a transcriptomic-enabled metabolite scoring  
23 algorithm integrating network architecture. This platform identified nutrients *C. difficile*  
24 used preferentially between infections, which were validated through untargeted mass  
25 spectrometry of each microbiome. Our results supported the hypothesis that *C. difficile*  
26 inhabits alternative nutrient niches across cecal microbiomes with increased preference  
27 for nitrogen-containing carbon sources, particularly Stickland fermentation substrates  
28 and host-derived aminoglycans.

## 29 **Importance**

30 Infection by the bacterium *Clostridium difficile* causes an inflammatory diarrheal disease  
31 which can become life-threatening, and has grown to be the most prevalent nosocomial  
32 infection. Susceptibility to *C. difficile* infection is strongly associated with previous  
33 antibiotic treatment, which disrupts the gut microbiota and reduces its ability to prevent  
34 colonization. In this study we demonstrated that *C. difficile* altered pathogenesis  
35 between hosts pretreated with antibiotics from separate classes, as well as exploited  
36 different nutrient sources across these environments. Our metabolite importance  
37 calculation also provides a platform to study nutrient requirements of pathogens during  
38 the context of infection. Our results suggest that *C. difficile* colonization resistance is  
39 mediated by multiple groups of bacteria competing for several subsets of nutrients, and  
40 could explain why total reintroduction of competitors through fecal microbial transplant is  
41 the most effective treatment to date. This work could ultimately contribute to the  
42 identification of targeted measures that prevent or reduce *C. difficile* colonization  
43 including pre- and probiotic therapies.

## 44 **Introduction**

45 Infection by the Gram-positive, spore-forming bacterium *Clostridium difficile* has  
46 increased in both prevalence and severity across numerous countries during the last  
47 decade (1). In the United States, *C. difficile* was estimated to have caused >500,000  
48 infections and resulted in ~\$4.8 billion worth of acute care costs in 2014 (2). *C. difficile*  
49 infection (CDI) causes an array of toxin-mediated symptoms ranging from abdominal  
50 pain and diarrhea to the more severe conditions pseudomembranous colitis and toxin  
51 megacolon. Prior treatment with antibiotics is the most common risk factor associated  
52 with development of CDI (3). Antibiotics likely contribute to susceptibility to CDI by  
53 disrupting the gut microbiota (4). In mouse models, multiple antibiotics can induce  
54 susceptibility to *C. difficile* colonization (5–7). Notably, each antibiotic resulted in unique  
55 gut bacterial communities that were receptive to high levels of *C. difficile* colonization.  
56 Others have also shown that antibiotics from multiple classes also alter the gut  
57 metabolome, increasing the concentrations of some *C. difficile* growth substrates (6, 8–  
58 10). The ability of an unaltered murine gut community to exclude *C. difficile* colonization  
59 supports the nutrient-niche hypothesis, which states that an organism must be able to  
60 utilize a subset of available resources better than all competitors to colonize the  
61 intestine (11, 12). Taken together these results are a strong indication that the healthy  
62 gut microbiota inhibits the growth of *C. difficile* by limiting the availability of the  
63 substrates it needs to grow.

64 Based on genomic and *in vitro* growth characteristics, *C. difficile* appears able to adapt  
65 to a variety nutrient niches (13). *C. difficile* has a relatively large and mosaic genome, it  
66 can utilize a variety of growth substrates, and possesses a diverse array host range (6,

67 14–16). These qualities are hallmarks of ecological generalists (17). *C. difficile* has also  
68 been shown to integrate signals from multiple forms of carbon metabolism to regulate its  
69 pathogenesis. *In vitro* transcriptomic analyses suggests that high concentrations of  
70 easily metabolized carbon sources, such as glucose or amino acids, inhibit toxin gene  
71 expression and sporulation (18, 19). Other studies have indicated that other aspects of  
72 *C. difficile* metabolism may be influenced through environmental nutrient concentration-  
73 sensitive global transcriptional regulators such as CodY and CcpA (20, 21). These  
74 previous analyses have mainly focused on *in vitro* growth (22, 23) or colonization of  
75 germfree mice (14, 21). Although these analyses are informative, they are either  
76 primarily directed toward the expression of pathogenicity factors or lack the context of  
77 the gut microbiota which *C. difficile* must compete against for substrates. Metabolomic  
78 investigations have also been used to assay changes in bacterial metabolism as they  
79 relate to CDI and have characterized the levels of germinants and growth substrate  
80 availability (6, 10); however, metabolomic approaches are unable to attribute a  
81 metabolite to specific organisms in the gut community. Thus metabolomics more closely  
82 represents the echoes of total community metabolism, not the currently active  
83 processes of any one population. It has thus far not been possible to study *C. difficile*'s  
84 metabolism *in vivo*.

85 To overcome these limitations, we implemented transcriptomic and untargeted  
86 metabolomic analyses of *C. difficile* and the surrounding environment to better  
87 understand the active metabolic pathways in a model of infection. Based on the ability  
88 of *C. difficile* to grow on a diverse array of carbon sources and its ability to colonize a  
89 variety of communities, we hypothesized that *C. difficile* adapts its metabolism to fit the

90 context of the environment it is attempting colonize. To test this hypothesis, we  
91 employed a mouse model of infection to compare the response of *C. difficile* to the gut  
92 environment caused by three antibiotics from distinct classes. By characterizing the  
93 transcriptome of *C. difficile* in these different communities and the metabolome of the  
94 respective environments using paired samples from the same groups of mice, we were  
95 able to generate a systems model to directly test the nutrient-niche hypothesis.

## 96 **Results**

### 97 **Levels of *C. difficile* sporulation and toxin activity vary among different**

98 **microbiomes.** Conventionally-reared SPF mice were treated with either streptomycin,

99 cefoperazone, or clindamycin (Table 1 and Fig. S1). These antibiotics were selected

100 because they each have distinct and significant impacts on the structure of the cecal

101 microbiome (Fig. S2A and S2B). We challenged the antibiotic treated mice and

102 germfree (ex-GF) mice with *C. difficile* stain 630 to understand the pathogen's

103 physiology with and without other microbiota. This toxigenic strain of *C. difficile* was

104 chosen for its moderate clinical severity in mouse models (24) and well-annotated

105 genome (25). After infection, we measured sporulation and toxin production at 18 hours

106 post inoculation. That time point corresponded with when another laboratory strain of *C.*

107 *difficile* reached its maximum vegetative cell density in the cecum with limited

108 sporulation (26). There was not a significant difference in the number of vegetative *C.*

109 *difficile* cells in the ceca of mice pretreated with any of the three antibiotics (Fig. 1A). All

110 antibiotic treated and ex-GF mice were colonized to  $\sim 1 \times 10^8$  colony forming units (cfu)

111 per gram of cecal content, while untreated mice maintained colonization resistance to *C.*

112 *difficile* (Fig. 1A). Despite having the same number of vegetative *C. difficile* cells, more

113 spores were detected in ex-GF mice than in the antibiotic pretreated mice ( $P = 0.003$ ,  
114 0.004, and 0.003; Fig. 1B). There was also a significantly higher toxin titer in ex-GF  
115 animals than any other colonized group (all  $P < 0.001$ ), with slight variation between  
116 antibiotic pretreatment groups (Fig. 1C). These results showed that *C. difficile* colonized  
117 different communities to consistently high levels. In addition, colonization in the context  
118 of different microbiomes resulted in moderate differences in the expression of *C. difficile*  
119 pathogenicity. To investigate the physiology of *C. difficile* when colonizing distinct  
120 susceptible gut environments, we performed whole transcriptome analysis of *C. difficile*  
121 from the same cecal content of the same mice.

122 ***C. difficile* alters its gene expression pathways when colonizing distinct**  
123 **antibiotic-pretreated environments.** Utilizing aliquots from the same mice in the  
124 previous assays, we attempted to measure differential expression of specific genes  
125 associated with *in vivo* phenotype changes reported in previous studies. Microarray-  
126 based gene expression measurement was not a viable alternative to sequencing as the  
127 amount of background orthologous transcription from other bacterial species would  
128 contribute greatly to non-specific binding and bias the true *C. difficile* signal, therefore  
129 we employed an RNA-Seq based approach to quantify transcription. As *C. difficile*  
130 represented a small percentage of the community in each colonized environment (Fig.  
131 S2C), making it impossible to sequence the transcriptome of individual mice due to the  
132 depth required to sufficiently sample the transcripts of *C. difficile*. This required the  
133 generation of a single transcriptome per condition using pooled mRNA from all mice  
134 within each pretreatment group. Following sequencing, read curation, and stringent  
135 mapping to *C. difficile* str. 630 genes (Materials & Methods) we implemented two steps

136 of abundance normalization to compare expression between groups. Transcript  
137 abundances for each target gene were first corrected to both read length and target  
138 gene length, which resulted in an average per-base expression level for each. Adjusted  
139 values were then down-sampled to the same total read abundance for each mapping  
140 effort, allowing for even comparison between the conditions. Additionally, before  
141 proceeding with the analysis we did and assessed variation in expression of select  
142 bacterial housekeeping genes across treatment groups (Fig. S5A). Due to the  
143 heterogeneity of *C. difficile* reference genes across strains (27), DNA gyrase subunit A  
144 (GyrA), threonyl-tRNA synthetase (ThrS), and ATP-dependent Clp protease (ClpP)  
145 were chosen because of their conservation across bacterial phyla and have been  
146 commonly utilized as standards of comparison for numerous transcriptional studies (14,  
147 28, 29). Consistent expression for each of the housekeeping genes was observed  
148 across treatments, which supported that our results were more likely to be a true  
149 reflection of *C. difficile* expression *in vivo*.

150 Our initial transcriptomic analysis focused on genes involved in sporulation, toxin  
151 production, quorum sensing, and metabolite-regulated sigma factors (Fig. S3). Despite  
152 large-scale differences between pretreatment groups, no clear trends were evident  
153 between gene expression and colonization, sporulation, or toxin production. This further  
154 indicated that *C. difficile* adapted its metabolism to the environment that it colonized. As  
155 such, we next focused on specific groups of genes known to contribute to *C. difficile*  
156 metabolism (Fig. 2A & Table S1). Genes involved in amino acid catabolism, including  
157 those that encoded enzymes involved in Stickland fermentation and general peptidases,  
158 had the highest level of expression. Stickland fermentation refers to the coupled

159 fermentation of amino acid pairs in which one is deaminated and the other is reduced to  
160 ultimately generate ATP (30). This suggested that *C. difficile* catabolized environmental  
161 amino acids during infection, regardless of the structure of the surrounding community.  
162 Although there were gene categories that were equally expressed across conditions in  
163 spite of the community differences, there were patterns of expression for certain gene  
164 families and specific genes that were distinct to each antibiotic pretreatment. In mice  
165 pretreated with cefoperazone, *C. difficile* tended to have more expression of genes in  
166 the ABC sugar transporter and sugar alcohol catabolism (e.g. mannitol) families and  
167 fewer genes in the PTS transporter family than the other pretreatment groups. In mice  
168 pretreated with clindamycin, *C. difficile* tended to have higher expression of genes from  
169 disaccharide catabolism (e.g. beta-galactosidases and trehalose/maltose/cellibiose  
170 hydrolases), fermentation product metabolism (including consumption or production of  
171 acetate, lactate, butyrate, succinate, ethanol, and butanol), and PTS transporter  
172 families. Genes from the sugar alcohol catabolism and ABC sugar transporter families  
173 were not highly expressed in the clindamycin-pretreated mice. Finally, in mice  
174 pretreated with streptomycin, *C. difficile* had higher levels of expression of genes from  
175 the sugar alcohol catabolism (e.g. sorbitol) and PTS transporter families. Combined,  
176 these results suggested that while catabolism of amino acids and specific  
177 carbohydrates are core components of the *C. difficile* nutritional strategy during  
178 infection, *C. difficile* adapted its metabolism across different susceptible environments.

179 **Genome-scale metabolic model structure underscores known *C. difficile***  
180 **physiology.** To further investigate which metabolites were differentially utilized between  
181 conditions, we created a generalizeable tool to *de novo* generate genome-enabled



182 directed, bipartite metabolic models of bacterial species using KEGG gene and  
183 biochemical reaction annotations. We implemented this for *C. difficile* str. 630 shown in  
184 Fig. 3A, with enzymes and metabolites were represented by nodes, and their  
185 interactions by directed connecting edges. The *C. difficile* str. 630 network we created  
186 contained a total of 447 enzymes and 758 metabolites, with 2135 directed edges. To  
187 validate our metabolic network, we analyzed network topology by calculating two  
188 metrics of centrality, betweenness centrality (BC) and closeness centrality (CC), to  
189 determine which nodes are critical to the structure of the metabolic network and if these  
190 patterns reflect known biology (Table S2). Both metrics utilize shortest paths, which  
191 refer to fewest possible number of network connections that lie between two given  
192 nodes. The BC of each node is the fraction of shortest paths that pass through that  
193 node and connect all other potential pairs of nodes. In biological terms, this refers to the  
194 amount of influence a given hub has on the overall flow of metabolism (31). Similarly,  
195 CC is the reciprocal sum of the lengths of shortest paths included in each node's BC.  
196 This value demonstrates how essential a given node is to the overall structure of the  
197 metabolic network (32). Metabolic network structural studies of *Escherichia coli* have  
198 found that metabolites with the highest centrality calculations are involved in  
199 fundamental processes in metabolism, namely glycolysis and the citrate acid cycle  
200 pathway (33). As such, these metrics allow for assessment of the degree to which a  
201 metabolic network accurately depicts established principles of bacterial metabolism.  
202 Following application of both methods, we found 5 enzymes that were shared between  
203 the top 10 enzymes from BC and CC calculations (2-dehydro-3-  
204 deoxyphosphogluconate aldolase, aspartate aminotransferase, pyruvate-flavodoxin

205 oxidoreductase, formate C-acetyltransferase, and 1-deoxy-D-xylulose-5-phosphate  
206 synthase). These enzymes primarily participate in core processes including glycolysis,  
207 the pentose phosphate pathway, or the citric acid cycle. Upon analysis of the other 15  
208 high-scoring enzymes combined from BC and CC analyses, the majority were also  
209 components of the previously mentioned pathways, as well as several for the  
210 metabolism of amino acids (Table S2). Similarly, the intersection of those substrates  
211 with high both BC and CC values revealed 6 metabolites as central nodes to the  
212 metabolism of *C. difficile* (pyruvate, acetyl-CoA, 2-oxoglutarate, D-4-hydroxy-2-  
213 oxoglutarate, D-glyceraldehyde 3-phosphate, and L-glutamate). Not only are these  
214 members of glycolysis and the citric acid cycle, but pyruvate, acetyl-CoA, and L-  
215 glutamate contribute to numerous intracellular pathways as forms of biological  
216 "currency" (33). Notably absent from the most well-connected metabolites were  
217 molecules like ATP or NADH. Their exclusion is likely a byproduct of the KEGG  
218 LIGAND reference used for network construction, which excludes cofactors from most  
219 biochemical reactions. While this may be a limitation of certain analyses, our study was  
220 not affected as the primary interest was in those substrates acquired from the  
221 environment. These results reflected the defined biological patterns of *C. difficile* and  
222 was therefore a viable platform to study metabolism of the pathogen.

223 **Metabolite importance algorithm reveals adaptive nutritional strategies of *C.***  
224 ***difficile* during infection of distinct environments.** We next sought to include the  
225 transcriptomic results into the metabolic model to infer which metabolites *C. difficile*  
226 most likely utilized from a given environment. To accomplish this we mapped  
227 normalized transcript abundances to the enzyme nodes in the network. Similar

228 approaches have been previously successful in demonstrating that transcript  
229 abundance data can be utilized through the lense of genome-scale metabolic networks  
230 to accurately predict microbial metabolic responses to environmental pertubation and  
231 identify reporter metabolites of changes (34). In our system, the importance of each  
232 metabolite was measured as the  $\log_2$ -transformed difference in average transcript levels  
233 of enzymes that use the metabolite as a substrate and those that generate the  
234 metabolite as a product (Fig. 3B). A metabolite with a high importance score was more  
235 likely obtained from the environment because the expression of genes for enzymes that  
236 produce the metabolite were low. It is important to note here that molecules that are  
237 more likely produced in our model are not necessarily likely to be released to the  
238 environment. Our models do not include the synthesis of large macromolecules (ie. long  
239 polypeptides or cytoskeleton) and should therefore only be utilized to consider input  
240 metabolites to a network. Due to the previously mentioned limited technical replication  
241 of sequencing efforts, we adopted a Monte Carlo-style simulation for iterative random  
242 transcriptome comparison to provide statistical validation of our network-based findings.  
243 This process generated random score distributions for each metabolite node in the  
244 network, which made it possible to calculate a confidence interval that represented  
245 random noise for each metabolite. This ultimately allowed for assessment of the  
246 probability that a given metabolite was excluded from the associated null distribution  
247 (Fig. 3C).

248 To identify the core metabolites that were most essential for *C. difficile* growth,  
249 regardless of the environment, we cross-referenced the 40 highest scoring metabolites  
250 from each treatment group (Fig. 4A). Aminoglycan N-acetylglucosamine (GlcNAc) was

251 found to have the highest median importance of all shared metabolites, which has  
252 been shown to be a readily available source of carbon and nitrogen which can be  
253 limiting in the gut (21). We went on to confirm that our strain of *C. difficile* could  
254 metabolize GlcNAc for growth (Fig. 4B) in *C. difficile* minimal media (35). The Stickland  
255 fermentation acceptor proline was also found to be important in all conditions tested  
256 (36). *C. difficile* is auxotrophic for not only proline, but also cysteine, leucine, isoleucine,  
257 tryptophan, and valine, which prevented testing for *in vitro* growth changes on proline  
258 despite providing for modest growth in the no carbohydrate control. Previous analysis of  
259 *C. difficile* colonizing GF mice under mono-associated conditions indicated that *C.*  
260 *difficile* uses both sets of metabolites (21); however, use of these metabolites in the  
261 context of a complex community of potential competitors has not been observed  
262 previously. This analysis indicated that these metabolites might be an integral  
263 component of the nutrient niche for *C. difficile*.

264 ***In vivo* metabolomic analysis supports that *C. difficile* consumes metabolites**  
265 **indicated by metabolic modeling.** To further validate the results of our metabolic  
266 model, we tested the effect of *C. difficile* on the metabolite pool in additional aliquots of  
267 cecal content from the antibiotic-treated and GF mice used in all previous analyses. We  
268 employed non-targeted ultra-performance liquid chromatography and mass  
269 spectrometry (UPLC-MS) to measure the relative *in vivo* concentrations of metabolites  
270 in the conditions investigated, with special attention to those highlighted by large  
271 importance scores. We tested whether the susceptible communities had significantly  
272 different concentrations of each metabolite relative to untreated SPF mice and whether  
273 the presence of *C. difficile* affected the metabolite composition.

274 First, we compared the relative concentration of important metabolites in untreated SPF  
275 mice and antibiotic pretreated mice in the absence of CDI (Fig. 5). We found that the  
276 relative concentration of GlcNAc was actually significantly lower in all susceptible  
277 conditions (Fig. 5A; all  $P < 0.001$ ). The Stickland fermentation acceptors proline (all  $P <$   
278 0.05) and hydroxyproline (all  $P < 0.05$ ) were significantly higher in all susceptible  
279 environments tested (Fig. 5B and S7B). Conversely, the Stickland donor alanine was  
280 significantly lower across all susceptible conditions (Fig. 5D; all  $P < 0.05$ ). Succinate  
281 was significantly higher in both streptomycin and clindamycin pretreated mice (Fig. 5E;  
282 all  $P < 0.05$ ). Among the cefoperazone-pretreated SPF and GF mice, we also found that  
283 mannitol/sorbitol (Fig. 5C), N-acetylneuraminate (Fig. 5F), and glycine (Fig. S6A) were  
284 significantly higher in cefoperazone-treated SPF and GF mice (all  $P < 0.05$ ). These  
285 results supported the assertion that antibiotic treatment opened potential nutrient niches  
286 that *C. difficile* was able to exploit for its growth.

287 Second, we compared relative concentrations of important metabolites during CDI and  
288 mock-infection within each pretreatment group (Fig. 5). Both groups of host-derived  
289 aminoglycans, GlcNAc/GalNAc (Fig. 5A) and Neu5Ac (Fig. 5F), were significantly lower  
290 when in the presence of *C. difficile* in ex-GF mice ( $P < 0.05$  and 0.01). In agreement  
291 with the previous results, we found that the Stickland acceptors proline (Fig. 5B) and  
292 hydroxyproline (Fig. S6C) were significantly lower in every *C. difficile* colonized  
293 environment (all  $P < 0.05$ ). Glycine, another preferred Stickland acceptor, was lower in  
294 each condition following infection with significant change in cefoperazone-pretreated  
295 mice (Fig. S6D;  $P < 0.05$ ). The Stickland donors leucine and isoleucine were  
296 significantly lower in all infected conditions except streptomycin-pretreated mice (Fig.

297 S6A and S6B; all  $P < 0.05$ ). Concentrations of alanine were also lower in all infected  
298 conditions compared to mock infection, however none of the changes met our threshold  
299 for significance (Fig. 5D). These results strongly supported the hypothesis that amino  
300 acids are a primary energy source of *C. difficile* during infection. A significant difference  
301 was seen for mannitol/sorbitol in ex-GF mice ( $P < 0.01$ ), but not in cefoperazone-  
302 pretreated mice (Fig. 5C). Although a lower the concentration of succinate in both  
303 streptomycin and clindamycin pretreated mice was observed, neither was found to be  
304 significant. Overall, metabolomic analysis supported our metabolite importance  
305 algorithm for predicting the metabolites utilized by *C. difficile* during different infection  
306 conditions. Results from metabolic modeling combined with untargeted metabolomic  
307 analysis also suggested a possible hierarchy of preferred growth substrates.

## 308 **Discussion**

309 Our results expand upon previous understanding of *C. difficile* metabolism during  
310 infection by showing that not only does the pathogen adapt its metabolism to life inside  
311 of a host (14, 21), but also to the context of the specific gut environment in which it finds  
312 itself. Previous transcriptomic efforts to measure the response of *C. difficile* have  
313 demonstrated *in vivo* changes in metabolism following colonization of GF mice. In this  
314 study, we utilized a conventionally-reared mouse model of infection to compare the  
315 response of *C. difficile* to colonization in the context of varied gut communities  
316 generated by pretreatment with representatives from distinct classes of antibiotics. With  
317 these models, we identified subtle differences in sporulation and toxin activity between  
318 each antibiotic-pretreated condition. Transcriptomic sequencing of *C. difficile* across  
319 colonized environments indicated complex expression patterns of genes in catabolic

320 pathways for a variety of carbon sources. Through integration of transcriptomic data  
321 with genome-scale metabolic modeling, we were able to deconvolute these signals.  
322 This allowed us to observe that *C. difficile* likely generated energy by metabolizing  
323 specific alternative carbohydrates, carboxylic acids, and aminoglycans across colonized  
324 conditions. We also found that Stickland fermentation substrates and products, as well  
325 another host-derived amino glycan N-acetylglucosamine, were consistently among the  
326 highest scoring shared metabolites which indicated that these metabolites were central  
327 to the *in vivo* nutritional strategy of *C. difficile*. To confirm our modeling-based results we  
328 employed untargeted mass spectrometry that demonstrated greater availability of many  
329 metabolites highlighted by our algorithm in susceptible gut environs. Metabolomic  
330 analysis further revealed differential reduction of important metabolites during CDI,  
331 which suggested a hierarchy for the utilization of certain growth nutrients.

332 An explanation for the differences seen in metabolite importance and substrate  
333 availability could be the concomitant lower population density of one or more  
334 competitors for certain resources. Ex-GF mice, where no other microbial competitors  
335 are present, provided a partially controlled system of resource competition. In this  
336 condition, Neu5Ac was found to be the most important substrate and concentrations  
337 Neu5Ac were significantly higher in susceptible mice. The concentrations of Neu5Ac  
338 were concordantly lower in infected mice relative to mock-infected mice. The same  
339 trend was also present in cefoperazone-pretreatment, which suggested that *C. difficile*  
340 may be less competitive for this host-derived aminoglycan and may only have access  
341 when certain competitors are no longer present. In the presence of a microbiota, *C.*  
342 *difficile* population-level nutrient utilization patterns differed across each environment

343 tested. For example, past studies have concluded that specific PTS and ABC transport  
344 systems are upregulated *in vivo* (14, 21), but our results indicate more complex  
345 regulation with inverse expression of the respective systems between antibiotic  
346 pretreatments (Fig. 2). In agreement with earlier research we found that *C. difficile* likely  
347 fermented amino acids for energy during infection of GF mice in addition to aminoglycan  
348 catabolism. Our results go on to support that this metabolic strategy was conserved  
349 across all infection conditions tested. Several Stickland substrates had consistently  
350 higher importance scores including alanine, leucine, and proline indeed dropped  
351 concentration during infection (Table S3, Fig. 5A, and S6A). Fermentation of amino  
352 acids provides not only carbon and energy, but are also a source of nitrogen which is a  
353 limited resource in the mammalian lower gastrointestinal tract (37). This makes  
354 Stickland fermentation a valuable metabolic strategy, and it stands to reason that *C.*  
355 *difficile* would use this strategy across all environments it colonizes. This same principle  
356 may also extend to host mucus layer derived aminoglycans as they are another source  
357 of carbon and nitrogen which, despite augmented release by members of the microbiota  
358 (38), would be present at some basal concentration regardless of other species'  
359 intercession. Finally, we did find disagreement in some metabolite importance scores  
360 and the difference in *in vivo* concentration of previously suggested *C. difficile* growth  
361 substrates between mock infected and infected mice. This may indicate a nutrient  
362 preference hierarchy during infection. Based on our results, we propose that amino  
363 acids are prized above all other substrates, followed by aminoglycans, then  
364 carbohydrates, sugar alcohols, or carboxylic acids depending on their availability in the  
365 environment. Since the latter provide carbon and energy, but not nitrogen, it appears



366 that *C. difficile* metabolism strongly values nitrogen-containing carbon sources that fulfill  
367 a larger proportion of its biological requirements but this requires additional investigation  
368 to confirm.

369 Our systems approach to studying *C. difficile* metabolism during the infection of  
370 susceptible communities is novel because it combines multiple levels of biological data  
371 to identify metabolic trends that would not be apparent by a single method. Only through  
372 integrative multi-omic analysis of *C. difficile* infection employing genomics,  
373 transcriptomics, and metabolomics were we able to uncover a much clearer image of *C.*  
374 *difficile*'s nutrient niche space during infection in the context of complex microbial  
375 communities. By virtue of our importance algorithm's reliance on network topology, the  
376 signal contributed by those metabolites on the periphery of the network, which are more  
377 likely to be imported from the environment, was amplified. This approach could be  
378 especially useful for identifying edges of competition for nutrients between colonizing  
379 pathogens and indigenous communities of bacteria, as is the case with *C. difficile*. Our  
380 modeling platform may also allow for the identification of emergent properties for the  
381 metabolism of *C. difficile* during infection. One example could be the appearance of  
382 CO<sub>2</sub>, an apparent metabolic end product, in the list of shared important metabolites.  
383 Although this may be a shortcoming of the genome annotation, one group has posited  
384 that *C. difficile* may actually be autotrophic under certain conditions (39). These findings  
385 highlight that our method not only identifies growth substrates, but reports all  
386 metabolites that are being utilized for other processes.

387 Several factors limited our ability to generate and interpret transcriptomic and  
388 metabolomic data. Most prominently, we were forced to pool the cecal contents of

389 multiple animals to generate a sufficient quantity of high quality RNA that would permit  
390 us to sample the transcriptome of a rare member of the microbiome. Due to possible  
391 biological variation between samples that could be masked by this approach, we  
392 quantified within-group sample variation for vegetative CFU, 16S rRNA gene  
393 abundance, and untargeted mass-spectrometry (Fig. S5B-D). This revealed extremely  
394 low variability in each treatment group at multiple levels of biology, and since these data  
395 were collected using matched cecal samples, we were more confident that our  
396 transcriptomic results reflected reality. Metabolomic comparisons were also complicated  
397 by the fact that multiple organisms contribute to the metabolite pool. The metabolic  
398 patterns of the other species in each system (host and microbe) could instead be  
399 altered by pathogen colonization. As the concentrations of metabolites in our untargeted  
400 assay were reported in relative terms, it was difficult to discern whether the available  
401 biomass of *C. difficile* reaches a level to create these differences on its own. Possible  
402 limitations of our modeling approach also existed, despite much of our results being  
403 consistent with previously published work and our own untargeted metabolomic  
404 analysis. Ultimately, the metabolite importance calculation is dependent on correct and  
405 existing gene annotation. In this regard it has been shown that the pathway annotations  
406 in KEGG are robust to missing elements (40), however this does not completely  
407 eliminate the possibility for this type of error. Due to the topology of the metabolic  
408 network, we were also unable to integrate stoichiometry for each reaction which may  
409 effect rates of consumption or production. Reaction reversibility also varies depending  
410 on versions of enzymes possessed by each species. Incorrect directionality annotations  
411 may lead to mislabeling reactants or products and potentially lead to incorrect

412 importance calculations. With additional manual curation of the *C. difficile* metabolic  
413 network, more species specific discoveries can eventually be made. Ultimately, the  
414 application of multiple methods to study the altered physiology of *C. difficile* in mock-  
415 infected and infected communities allowed us to validate our results based on known  
416 elements of *C. difficile* biology and to internally cross validate the novel results from our  
417 experiments. Ultimately, these results combine to underscore predictions of nutrient  
418 niche plasticity.

419 Our combined genomic, transcriptomic, and metabolomic analysis showed that when  
420 infecting diverse host-associated gut environments, *C. difficile* optimized its nutrient  
421 utilization profile to each gut environment and effectively colonize the host. Focusing on  
422 previously established metabolic capabilities of the pathogen, we identify that these  
423 forms of metabolism are differentially important to *C. difficile* when colonizing distinct  
424 environments. These results have implications for the development of targeted  
425 measures to prevent *C. difficile* colonization through pre- or probiotic therapy. In the  
426 future, this systems-level approach could be easily expanded to study the niche  
427 landscape of entire communities of bacteria in response to antibiotic perturbation or  
428 pathogen colonization.

## 429 **Materials and Methods**

430 **Animal care and antibiotic administration.** Six-to-eight week-old GF C57BL/6 mice  
431 were obtained from a single breeding colony maintained at the University of Michigan  
432 and fed Laboratory Rodent Diet 5001 from LabDiet for all experiments. All animal  
433 protocols were approved by the University Committee on Use and Care of Animals at  
434 the University of Michigan and carried out in accordance with the approved guidelines.

435 Specified SPF animals were administered one of three antibiotics; cefoperazone,  
436 streptomycin, or clindamycin (Table 1). Cefoperazone (0.5 mg/ml) and streptomycin (5.0  
437 mg/ml) were administered in distilled drinking water *ad libitum* for 5 days with 2 days  
438 recovery with untreated distilled drinking water prior to infection. Clindamycin (10 mg/kg)  
439 was given via intraperitoneal injection 24 hours before time of infection. Adapted from a  
440 previously described model (24).

441 **C. difficile infection and necropsy.** All *C. difficile* strain 630 spores were prepared  
442 from a single large batch whose concentration was determined a week prior to  
443 challenge. On the day of challenge,  $1 \times 10^3$  *C. difficile* spores were administered to mice  
444 via oral gavage in phosphate-buffered saline (PBS) vehicle. Subsequent quantitative  
445 plating to enumerate the spores was performed to ensure correct dosage. Mock-  
446 infected animals were given an oral gavage of 100  $\mu$ l PBS at the same time as those  
447 mice administered *C. difficile* spores. 18 hours following infection, mice were euthanized  
448 by carbon dioxide asphyxiation and necropsied to obtain the cecal contents. Two 100  $\mu$ l  
449 aliquots were immediately flash frozen for later DNA extraction and toxin titer analysis,  
450 respectively. A third 100  $\mu$ l aliquot was quickly transferred to an anaerobic chamber for  
451 quantification of *C. difficile* abundance. The remaining content in the ceca  
452 (approximately 1 mL) was mixed with 1 mL of sterile PBS in a stainless steel mortar  
453 housed in a dry ice and ethanol bath. The cecal contents of 9 mice from 3 cages was  
454 pooled into the mortar. Pooling cecal contents was necessary so that there would be a  
455 sufficient quantity of high quality rRNA-free RNA for deep sequencing. The pooled  
456 content was then finely ground and stored at  $-80^\circ$  C for subsequent RNA extraction.

457 **C. difficile cultivation and quantification.** Cecal samples were weighed and serially  
458 diluted under anaerobic conditions (6% H<sub>2</sub>, 20% CO<sub>2</sub>, 74% N<sub>2</sub>) with anaerobic PBS.  
459 Differential plating was performed to quantify both *C. difficile* spores and vegetative cells  
460 by plating diluted samples on CCFAE plates (fructose agar plus cycloserine (0.5%),  
461 cefoxitin (0.5%), and erythromycin (0.2%)) at 37° C for 24 hours under anaerobic  
462 conditions (41). It is important to note that the germination agent taurocholate was  
463 omitted from these plates to quantify only vegetative cells. In parallel, undiluted samples  
464 were heated at 60° C for 30 minutes to eliminate vegetative cells and leave only spores  
465 (42). These samples were serially diluted under anaerobic conditions in anaerobic PBS  
466 and plated on CCFAE with taurocholate (10%) at 37° C for 24 hours. Plating was  
467 simultaneously done for heated samples on CCFAE to ensure all vegetative cells had  
468 been eliminated.

469 **C. difficile toxin titer assay.** To quantify the titer of toxin in the cecum a Vero cell  
470 rounding assay was performed as in (43). Briefly, filtered-sterilized cecal content was  
471 serially diluted in PBS and added to Vero cells in a 96-well plate. Plates were blinded  
472 and viewed after 24 hour incubation for cell rounding. A more detailed protocol with  
473 product information can be found at:  
474 [https://github.com/SchlossLab/Jenior\\_Modeling\\_mSystems\\_2017/blob/master/protocols](https://github.com/SchlossLab/Jenior_Modeling_mSystems_2017/blob/master/protocols/toxin_assay/Verocell_ToxinActivity_Assay.Rmd)  
475 [/toxin\\_assay/Verocell\\_ToxinActivity\\_Assay.Rmd](https://github.com/SchlossLab/Jenior_Modeling_mSystems_2017/blob/master/protocols/toxin_assay/Verocell_ToxinActivity_Assay.Rmd)

476 **16S rRNA gene sequencing and read curation.** DNA was extracted from  
477 approximately 50 mg of cecal content from each mouse using the PowerSoil-htp 96  
478 Well Soil DNA isolation kit (MO BIO Laboratories) and an epMotion 5075 automated  
479 pipetting system (Eppendorf). The V4 region of the bacterial 16S rRNA gene was

480 amplified using custom barcoded primers and sequenced as described previously using  
481 an Illumina MiSeq sequencer (44). All 63 samples were sequenced on a single  
482 sequencing run. The 16S rRNA gene sequences were curated using the mothur  
483 software package (v1.36), as described previously (44). In short, paired-end reads were  
484 merged into contigs, screened for quality, aligned to SILVA 16S rRNA sequence  
485 database, and screened for chimeras. Sequences were classified using a naive  
486 Bayesian classifier trained against a 16S rRNA gene training set provided by the  
487 Ribosomal Database Project (RDP) (45). Curated sequences were clustered into  
488 operational taxonomic units (OTUs) using a 97% similarity cutoff with the average  
489 neighbor clustering algorithm. The number of sequences in each sample was rarefied to  
490 2,500 per sample to minimize the effects of uneven sampling.

491 **RNA extraction, shotgun library preparation, and sequencing.** Pooled, flash-frozen  
492 samples were ground with a sterile pestle to a fine powder and scraped into a sterile 50  
493 ml polypropylene conical tube. Samples were stored at -80° C until the time of  
494 extraction. Immediately before RNA extraction, 3 ml of lysis buffer (2% SDS, 16 mM  
495 EDTA and 200 mM NaCl) contained in a 50 ml polypropylene conical tube was first  
496 heated for 5 minutes in a boiling water bath (46). The hot lysis buffer was added to the  
497 frozen and ground cecal content. The mixture was boiled with periodic vortexing for  
498 another 5 minutes. After boiling, an equal volume of 37° C acid phenol/chloroform was  
499 added to the cecal content lysate and incubated at 37° C for 10 minutes with periodic  
500 vortexing. The mixture was the centrifuged at 2,500 x g at 4° C for 15 minutes. The  
501 aqueous phase was then transferred to a sterile tube and an equal volume of acid  
502 phenol/chloroform was added. This mixture was vortexed and centrifuged at 2,500 x g

503 at 4° for 5 minutes. The process was repeated until aqueous phase was clear. The last  
504 extraction was performed with chloroform/isoamyl alcohol to remove the acid phenol. An  
505 equal volume of isopropanol was added and the extracted nucleic acid was incubated  
506 overnight at -20° C. The following day the sample was centrifuged at 12000 x g at 4° C  
507 for 45 minutes. The pellet was washed with 0° C 100% ethanol and resuspended in 200  
508 µl of RNase-free water. Samples were then treated with 2 µl of Turbo DNase for 30  
509 minutes at 37° C. RNA samples were retrieved using the Zymo Quick-RNA MiniPrep.  
510 Completion of the DNase reaction was assessed using PCR for the V4 region of the  
511 16S rRNA gene for 30 cycles (Kozich, 2013). Quality and integrity of RNA was  
512 measured using the Agilent RNA 6000 Nano kit for total prokaryotic RNA. The Ribo-  
513 Zero Gold rRNA Removal Kit Epidemiology was then used to deplete 16S and 18S  
514 rRNA from the samples. Prior to library construction, quality and integrity as measured  
515 again using the Agilent RNA 6000 Pico Kit. Stranded RNA-Seq libraries were made  
516 constructed with the TruSeq Total RNA Library Preparation Kit v2. The Agilent DNA  
517 High Sensitivity Kit was used to measure concentration and fragment size distribution  
518 before sequencing. High-throughput sequencing was performed by the University of  
519 Michigan Sequencing Core in Ann Arbor, MI. For all groups, sequencing was repeated  
520 across 4 lanes of an Illumina HiSeq 2500 using the 2x50 bp chemistry.

521 **cDNA read curation, mapping, and normalization.** Raw read curation was performed  
522 in a two step process. First, residual 5' and 3' Illumina adapter sequences were  
523 removed using CutAdapt (47) on a per library basis. Reads were then quality trimmed  
524 using Sickle (Joshi, 2011) on the default settings. An average of ~261,000,000 total  
525 reads (both paired and orphaned) remained after quality trimming. Mapping was



526 accomplished using Bowtie2 (48) and the default stringent settings allowing for 0  
527 mismatches again target reference genes. An average of ~6,880,000 reads in sample  
528 each mapped to the annotated nucleotide gene sequences of *Clostridioides difficile* 630  
529 from the KEGG: Kyoto Encyclopedia of Genes and Genomes (49). Optical and PCR  
530 duplicates were then removed using Picard MarkDuplicates  
531 (<http://broadinstitute.github.io/picard/>), leaving an average of ~167,000 reads per  
532 sample for final analysis (Table S5). The remaining mappings were converted to  
533 idxstats format using Samtools (50) and the read counts per gene were tabulated.  
534 Discordant pair mappings were discarded and counts were then normalized to read  
535 length and gene length to give a per base report of gene coverage. Each collection of  
536 reads was then subsampled to 90% of the lowest sequence total across the libraries  
537 resulting in even quantities of normalized read abundances in each group to be utilized  
538 in downstream analysis. This method was chosen as normalization to housekeeping  
539 genes would artificially remove their contributions to metabolic flux and reduce the  
540 information provided by our metabolite importance calculations within our metabolic  
541 modeling approach.

542 **Reaction Annotation & Bipartite Network Construction.** The metabolism of *C.*  
543 *difficile* strain 630 was represented as a directed bipartite graph with both enzymes and  
544 metabolites as nodes. Briefly, models were semi-automatically constructed using KEGG  
545 (2016 edition) ortholog (KO) gene annotations to which transcripts had been mapped.  
546 Reactions that each KEGG ortholog mediate were extracted from `ko_reaction.list`  
547 located in `/kegg/genes/ko/`. KOs that do not mediate simple biochemical reactions (e.g.  
548 mediate interactions of macromolecules) were omitted. Metabolites linked to each



549 reaction were retrieved from reaction\_mapformula.lst file located in  
550 /kegg/ligand/reaction/ from the KEGG release. Those reactions that did not have  
551 annotations for the chemical compounds the interact with are discarded. Metabolites  
552 were then associated with each enzyme and the directionality and reversibility of each  
553 biochemical conversion was also saved. This process was repeated for all enzymes in  
554 the given bacterial genome, with each enzyme and metabolite node only appearing  
555 once. The resulting data structure was an associative array of enzymes associated with  
556 lists of both categories of substrates (input and output), which could then be  
557 represented as a bipartite network. The final metabolic network of *C. difficile* strain 630  
558 contained a total of 1205 individual nodes (447 enzymes and 758 substrates) with 2135  
559 directed edges. Transcriptomic mapping data was then re-associated with the  
560 respective enzyme nodes prior to substrate importance calculations. Betweenness-  
561 centrality and overall closeness centralization indices were calculated using the igraph  
562 R package found at <http://igraph.org/r/>.

563 **Metabolite Importance Calculation.** The substrate importance algorithm (Fig. 3a)  
564 favors metabolites that are more likely acquired from the environment (not produced  
565 within the network), and will award them a higher score (Fig. 4b & 6c). The presumption  
566 of our approach was that enzymes that were more highly transcribed were more likely to  
567 utilize the substrates they act on due to coupled bacterial transcription and translation. If  
568 a compound was more likely to be produced, the more negative the resulting score  
569 would be. To calculate the importance of a given metabolite ( $m$ ), we used rarefied  
570 transcript abundances mapped to respective enzyme nodes. This was represented by  $t_o$   
571 and  $t_i$  to designate if an enzyme created or utilized  $m$ . The first step was to calculate the

572 average expression of enzymes for reactions that either created a given metabolite (i) or  
573 consumed that metabolite (ii). For each direction, the sum of transcripts for enzymes  
574 connecting to a metabolite were divided by the number of contributing edges ( $e_o$  or  $e_i$ ) to  
575 normalize for highly connected metabolite nodes. Next the raw metabolite importance  
576 score was calculated by subtracting the creation value from the consumption value to  
577 weight for metabolites that are likely acquired exogenously. The difference was  $\log_2$   
578 transformed for comparability between scores of individual metabolites. This resulted in  
579 a final value that reflected the likelihood a metabolite was acquired from the  
580 environment. Untransformed scores that already equaled to 0 were ignored and  
581 negative values were accounted for by transformation of the absolute value then  
582 multiplied by -1. These methods have been written into a single python workflow, along  
583 with supporting reference files, and is presented as bigSMALL v1.0 (Bacterial Genome-  
584 Scale Metabolic models for Applied reverse ecology) available in a public Github  
585 repository at <https://github.com/mjenior/bigsmall>.

586 **Transcriptome Randomization and Probability Distribution Comparison.** As  
587 sequencing replicates of *in vivo* transcriptomes was not feasible, we applied a Monte  
588 Carlo style simulation to distinguish calculated metabolite importances due to distinct  
589 transcriptional patterns for the environment measured from those metabolites that were  
590 constitutively important. We employed a 10,000-fold bootstrapping approach of  
591 randomly reassigning transcript abundance for enzyme nodes and recalculating  
592 metabolite importances. This approach was chosen over fitting a simulated  
593 transcriptome to a negative binomial distribution because it created a more relevant  
594 standard of comparison for lower coverage sequencing efforts. Using this method, each

595 substrate node accumulated a random probability distribution of importance scores  
596 which were then used to calculate the median and confidence interval to generate a  
597 probability for each metabolite importance score to be the result of more than chance.  
598 This was a superior approach to switch randomization since the connections of the  
599 network itself was created through natural selection and any large-scale alterations  
600 would yield biologically uninformative comparisons (51).

601 **Anaerobic *in vitro* *C. difficile* growth curves.** The carbon-free variation of *C. difficile*  
602 Basal Defined Medium (NCMM) was prepared as previously described (6). Individual  
603 carbohydrate sources were added at a final concentration of 5 mg/mL and pair-wise  
604 carbohydrate combinations were added at 2.5 mg/mL each (5 mg/mL total). A solution  
605 of the required amino acids was made separately and added when noted at identical  
606 concentrations to the same study. 245  $\mu$ l of final media mixes were added to a 96-well  
607 sterile clear-bottom plate. A rich media growth control was also included, consisting of  
608 liquid Brain-Heart Infusion with 0.5% cysteine. All culturing and growth measurement  
609 were performed anaerobically in a Coy Type B Vinyl Anaerobic Chamber (3.0% H, 5.0%  
610 CO<sub>2</sub>, 92.0% N, 0.0% O<sub>2</sub>). *C. difficile* str. 630 was grown for 14 hours at 37° C in 3 mL  
611 BHI with 0.5% cysteine. Cultures were then centrifuged at 2000 rpm for 5 minutes and  
612 resulting pellets were washed twice with sterile, anaerobic phosphate-buffered saline  
613 (PBS). Washed pellets were resuspended in 3 mL more PBS and 5  $\mu$ l of prepped  
614 culture was added the each growth well of the plate containing media. The plate was  
615 then placed in a Tecan Sunrise plate reader. Plates were incubated for 24 hours at 37°  
616 C with automatic optical density readings at 600 nm taken every 30 minutes. OD<sub>600</sub>  
617 values were normalized to readings from wells containing sterile media of the same type

618 at equal time of incubation. Growth rates and other curve metrics were determined by  
619 differentiation analysis of the measured OD<sub>600</sub> over time in R to obtain the slope at each  
620 time point.

621 **Quantification of *in vivo* metabolite relative concentrations.** Metabolomic analysis  
622 performed by Metabolon (Durham, NC), a brief description of their methods is as  
623 follows. All methods utilized a Waters ACQUITY ultra-performance liquid  
624 chromatography (UPLC) and a Thermo Scientific Q-Exactive high resolution/accurate  
625 mass spectrometer interfaced with a heated electrospray ionization (HESI-II) source  
626 and Orbitrap mass analyzer at 35,000 mass resolution. Samples were dried then  
627 reconstituted in solvents compatible to each of the four methods. The first, in acidic  
628 positive conditions using a C18 column (Waters UPLC BEH C18-2.1x100 mm, 1.7 µm)  
629 using water and methanol, containing 0.05% perfluoropentanoic acid (PFPA) and 0.1%  
630 formic acid (FA). The second method was identical to the first but was  
631 chromatographically optimized for more hydrophobic compounds. The third approach  
632 utilized a basic negative ion optimized conditions using a separate dedicated C18  
633 column. Basic extracts were gradient eluted from the column using methanol and water,  
634 however with 6.5mM Ammonium Bicarbonate at pH 8. Samples were then analyzed via  
635 negative ionization following elution from a hydrophilic interaction chromatography  
636 column (Waters UPLC BEH Amide 2.1x150 mm, 1.7 µm) using a gradient consisting of  
637 water and acetonitrile with 10mM Ammonium Formate, pH 10.8. The MS analysis  
638 alternated between MS and data-dependent MS n scans using dynamic exclusion. The  
639 scan range varied slightly between methods but covered 70-1000 m/z. Library matches

640 for each compound were checked for each sample and corrected if necessary. Peaks  
641 were quantified using area under the curve.

642 **Statistical methods.** All statistical analyses were performed using R (v.3.2.0).  
643 Significant differences between community structure of treatment groups from 16S  
644 rRNA gene sequencing were determined with AMOVA in the mothur software package.  
645 Significant differences of Inv. Simpson diversity, cfu, toxin titer, and metabolite  
646 concentrations were determined by Wilcoxon signed-rank test with Benjamini-Hochberg  
647 correction. Undetectable points used half the limit of detection for all statistical  
648 calculations. Significant differences for growth curves compared to no carbohydrate  
649 control (+ amino acids) were calculated using 1-way ANOVA with Benjamini-Hochberg  
650 correction.

## 651 **Funding Information**

652 This work was supported by funding from the National Institutes of Health to PDS  
653 (R01GM099514, P30DK034933, U19AI09087, and U01AI124255), VBY  
654 (P30DK034933, U19AI09087, and U01AI124255), a Translational Research Education  
655 Certificate grant to JLL (MICHR; UL1TR000433), and was partially supported by a  
656 predoctoral fellowship from the Cellular Biotechnology Training Program to MLJ  
657 (T32GM008353).

## 658 **Acknowledgements**

659 The authors would like to acknowledge Charles Koumpouras for assistance with DNA  
660 extractions and metabolomic sample preparation. We would also like to acknowledge  
661 members of the University of Michigan Germfree Mouse Center, University of Michigan  
662 Sequencing Core, and Metabolon for their assistance in experimental design, execution,

663 and data collection. Pooled and quality trimmed transcriptomic read data and  
664 experiment metadata are available through the NCBI Sequence Read Archive (SRA;  
665 PRJNA354635). Data processing steps for beginning from raw sequence data to the  
666 final manuscript are hosted at  
667 [http://www.github.com/SchlossLab/Jenior\\_Modeling\\_mSystems\\_2017](http://www.github.com/SchlossLab/Jenior_Modeling_mSystems_2017). The authors  
668 would additionally like to thank Geoffrey Hannigan Ph.D, Kaitlin Flynn Ph.D, and  
669 Nielsen Baxter Ph.D. for their suggestions on manuscript drafts.

670 **Author Affiliations Department of Microbiology and Immunology, University of**  
671 **Michigan, Ann Arbor, Michigan.** Matthew L. Jenior, Jhansi L. Leslie, & Patrick D.  
672 Schloss Ph.D.

673 **Department of Internal Medicine/Infectious Diseases Division, University of**  
674 **Michigan Medical Center, Ann Arbor, Michigan. Department of Microbiology and**  
675 **Immunology, University of Michigan, Ann Arbor, Michigan.** Vincent B. Young M.D.  
676 Ph.D.

677 **Author Contributions** M.L.J. conceived, designed and performed experiments,  
678 analyzed data, and drafted the manuscript. J.L.L. performed experiments, analyzed  
679 data, and contributed to the manuscript. V.B.Y. contributed to the manuscript. P.D.S.  
680 interpreted data and contributed the manuscript. The authors declare no conflicts of  
681 interest.

682 **Corresponding author** Correspondence to Patrick D. Schloss

683 **Table 1 | Antibiotics used during *C. difficile* murine infection models.**

| Antibiotic   | Class                          | Target                                                                                        | Activity                                                                                           | Administration                                                                           | Dosage                   |
|--------------|--------------------------------|-----------------------------------------------------------------------------------------------|----------------------------------------------------------------------------------------------------|------------------------------------------------------------------------------------------|--------------------------|
| Cefoperazone | Cephalosporin (3rd generation) | Primarily Gram-positive bacteria, with increased activity against Gram-negative bacteria      | Irreversibly crosslink bacterial transpeptidases to peptidoglycan and prevents cell wall synthesis | Drinking water Ad libitum for 5 days, 2 days untreated drinking water prior to infection | 0.5 mg/ml drinking water |
| Streptomycin | Aminoglycoside                 | Active against most Gram-negative aerobic and facultative anaerobic bacilli                   | Protein synthesis inhibitor through binding the 30S portion of the 70S ribosomal subunit           | Drinking water Ad libitum for 5 days, 2 days untreated drinking water prior to infection | 5.0 mg/ml drinking water |
| Clindamycin  | Lincosamide                    | Primarily active against Gram-positive bacteria, most anaerobic bacteria, and some mycoplasma | Protein synthesis inhibition through binding to the 23s portion of the 50S ribosomal subunit       | Intraperitoneal injection 24 hours prior to infection                                    | 10 mg/kg body weight     |

## 684 **Figure Legends**

### 685 **Figure 1 | Gut environment context affects *C. difficile* sporulation and toxin**

686 **activity.** Quantification of spore cfu and toxin titer from cecal content of infected mice (n  
687 = 9 per group). **(A)** Vegetative *C. difficile* cfu per gram of cecal content ( $P = \text{n.s.}$ ). **(B)** *C.*  
688 *difficile* spore cfu per gram of cecal content. **(C)** Toxin titer from cecal content measured  
689 by activity in Vero cell rounding assay. Dotted lines denote limits of detection (LOD).  
690 Values for undetectable points were imputed as half the LOD for calculation of  
691 significant differences. Significance ( $P < 0.05$ ), denoted by single asterisk, was  
692 determined with Wilcoxon signed-rank test with Benjamini–Hochberg correction.

### 693 **Figure 2 | *C. difficile* alters expression metabolic pathways between antibiotic**

694 **pretreatment models.** Each point in the ternary plot represents a unique gene from the  
695 annotated genome of *C. difficile* str. 630. Position reflects the ratio of median rarefied  
696 transcript abundance for that gene between the three colonized antibiotic pretreatment  
697 models. Genes from specific metabolic pathways of interest are labeled and  
698 transcription from all other genes are shown in gray. **(A)** Size of highlighted points is  
699 relative to the largest transcript abundance among the antibiotic pretreatments for each  
700 gene. Categories of metabolism are displayed separately in **(B-I)**. Genes, annotations,  
701 and normalized transcript abundances can be found in Table S1. Refer to Fig. S4 for  
702 additional figure interpretation.

### 703 **Figure 3 | *C. difficile* str. 630 genome-enabled bipartite metabolic network**

704 **architecture and transcriptomic-enabled metabolite importance calculation. (A)**

705 Largest component from the bipartite GEM of *C. difficile* str. 630. Enzyme node sizes  
706 reflect the levels of detectable transcript from each gene. Importance algorithm



707 components: (I) average transcription of reactions consuming a metabolite, (II) average  
708 transcription of reactions producing a metabolite, and (III) difference of consumption and  
709 production. **(B)** The expanded window displays a partial example of D-fructose  
710 importance calculation. Values in the red nodes represent normalized transcript reads  
711 mapping to enzymes. **(C)** Example 10000-fold Mont-Carlo simulation results  
712 corresponding to a significant importance score for **m**.

713 **Figure 4 | Metabolic network analysis reveals differential carbon source utilization**  
714 **by *C. difficile* across infections.** Reported metabolites were calculated to have <2.5%  
715 probability to be included in the associated random score distribution. Analysis was  
716 performed using the 40 highest scoring metabolites from each condition. **(A)** Shared  
717 importance represents the median score of metabolites that were consistently important  
718 among all infected conditions. Below the conserved patterns, are shown the distinct  
719 important metabolites for each group. **(B)** 18 hour *C. difficile* str. 630 *in vitro* growth  
720 validating substrates from network analysis. All statistical comparison was performed  
721 relative to no carbohydrate control (all  $P < 0.001$ ). Significance was determined with  
722 one-way ANOVA with Benjamini–Hochberg correction.

723 **Figure 5 | Untargeted *in vivo* metabolomics support network-based metabolite**  
724 **importance scores and suggest nutrient preference hierarchy.** Paired metabolites  
725 were quantified simultaneously as the only differ by chirality making differentiation  
726 impossible. Black asterisks inside the panels represent significant differences between  
727 mock and *C. difficile*-infected groups within separate treatment groups (all  $P < 0.05$ ).  
728 Gray asterisks along the top margin of each panel indicate significant difference from

729 untreated SPF mice (all  $P < 0.05$ ). Significance was determined with Wilcoxon signed-  
730 rank test with Benjamini–Hochberg correction.

731 **Supplementary Figure 1 | Experimental timelines for mouse model pretreatments**  
732 **and *C. difficile* infection.** 9 wild-type C57BL/6 mice across 3 cages were included in  
733 each treatment group. **(A)** Streptomycin or **(B)** cefoperazone administered *ad libitum* in  
734 drinking water for 5 days with 2 days recovery with untreated drinking water before  
735 infection, **(C)** a single clindamycin intraperitoneal injection one day prior to infection, or  
736 **(D)** no antibiotic pretreatment (for both SPF control and GF mice). If no antibiotics were  
737 administered in the drinking water, mice were given untreated drinking water for the  
738 duration of the experiment beginning 7 days prior to infection. At the time of infection,  
739 mice were challenged with  $1 \times 10^3$  *C. difficile* str. 630 spores. Euthanization and  
740 necropsy was done 18 hours post-challenge and cecal content was then collected.

741 **Supplementary Figure 2 | Analysis of bacterial community structure resulting**  
742 **from antibiotic treatment.** Results from 16S rRNA gene amplicon sequencing from  
743 bacterial communities of cecal content in both mock-infected and *C. difficile* 630-  
744 infected animals 18 hours post-infection across pretreatment models. **(A)** Non-metric  
745 multidimensional scaling (NMDS) ordination based on Theta<sub>YC</sub> distances for the gut  
746 microbiome of all SPF mice used in these experiments (n = 36). All treatment groups  
747 are significantly different from each other groups by AMOVA ( $P < 0.001$ ). **(B)** Inverse  
748 Simpson diversity for each cecal community from the mice in (A). Cecal communities  
749 from mice not treated with any antibiotics are significantly more diverse than any  
750 antibiotic-pretreated condition ( $P < 0.001$ ). **(C)** Representation of 16S amplicon reads  
751 contributed by *C. difficile* in each sequenced condition compared to the total bacterial  
752 community. The percents listed at the top of each group is the proportion of the total

753 community represented by *C. difficile*. Significantly less were for *C. difficile* were  
754 detected in each condition ( $P < 0.001$ ).

755 **Supplementary Figure 3 | Select *C. difficile* gene set expression compared**

756 **between treatment group.** Relative abundances of *C. difficile* transcript for specific

757 genes of interest. **(A)** Transcription for select genes from the *C. difficile* sporulation

758 pathway with the greatest variation in expression between the conditions tested. **(B)**

759 Relative abundances of transcript for genes that encode effector proteins from the *C.*

760 *difficile* pathogenicity locus. **(C)** Transcript abundances for genes associated with

761 quorum sensing in *C. difficile*. **(D)** Transcript relative abundance of select sigma factors

762 which expression or activity is influenced by environmental metabolite concentrations.

763 Asterisks (\*) indicate genes from which transcript was undetectable.

764 **Supplementary Figure 4 | Additional explanation for Figure 2 interpretation.**

765 Relative abundance of transcription for *C. difficile* 630 genes during infection across the

766 3 antibiotic pretreatment models used during this study. Points that are located closer to

767 a corner are more highly transcribed in the condition associated with that corner

768 compared to the others. As this shows a 3-dimensional data set in 2 dimensions, there

769 is an amount of distortion proximal to each corner. Simply put for points that are nearer

770 to an edge, a greater percentage of their total transcription was contributed by *C.*

771 *difficile* colonizing those mice. **(A)** This point represents the transcription for a gene that

772 is overrepresented in cefoperazone-pretreated mice. **(B)** This point represents a gene in

773 which transcripts are equally detectable in all 3 conditions. **(C)** Transcripts for this gene

774 are only underrepresented in only cefoperazone-pretreated mice, and are equally

775 detectable in clindamycin and streptomycin-pretreated animals.

776 **Supplementary Figure 5 | Levels of within-group variation across datasets**  
777 **generated for this study. (A)** Normalized transcript abundance of select housekeeping  
778 and central metabolism genes. (I) Housekeeping genes; DNA gyrase subunit A (GyrA),  
779 threonyl-tRNA synthetase (ThrS), and ATP-dependent Clp protease (ClpP). (II) Genes in  
780 separate metabolic pathways that contribute to input substrate importance; enolase,  
781 glycine reductase (GrdA), and D-proline reductase (PrdA). **(B)** Median sample variance  
782 for vegetative *C. difficile* cfu from each colonized condition. **(C)** Median and interquartile  
783 range of the sample variance of OTU abundances from 16S rRNA gene sequencing,  
784 sample variances for each OTU were calculated individually prior to summary statistic  
785 calculations. **(D)** Median and interquartile range of the sample variance of Scaled  
786 intensities from untargeted metabolomic analysis, sample variances for each metabolite  
787 were in the same fashion as with OTU abundances. Data (other than transcriptomic  
788 results) was collected from the same nine animals per group were ( $n = 9$ ).

789 **Supplementary Figure 6 | Change in *in vivo* concentrations of additional Stickland**  
790 **fermentation substrates.** Comparison of concentrations for other Stickland  
791 fermentation substrates from *C. difficile*-infected and mock-infected mouse cecal  
792 content 18 hours post-infection. Labels in the top left corner of each panel indicate  
793 whether the amino acid is a Stickland donor or acceptor. Black asterisks inside the  
794 panels denote significant differences between mock and *C. difficile*-infected groups  
795 within separate treatment groups (all  $P < 0.05$ ). Gray asterisks along the top margin of  
796 each panel indicate significant difference from untreated SPF mice (all  $P < 0.05$ ).

797 **Supplementary Table 1 | Specific genes and normalized cDNA read abundances**  
798 **included in analysis reported in Figure 2.** Transcript abundances reported in each of

799 the antibiotic associated columns were first normalized to both sequencing read length  
800 and target gene length. Each of the three groups were then even subsampled to an  
801 equal total sequences abundance of 13,000 reads to allow for comparability between  
802 groups. Additional columns indicate specific gene annotation (gene, pathways, &  
803 KEDD\_ID) as well as which group each gene belongs for ternary plot (family).

804 **Supplementary Table 2 | Normalized cDNA read abundances, gene annotations,**  
805 **and enzymatic reaction information used for metabolic model building for *C.***  
806 ***difficile* str. 630 KEGG orthologs across colonized conditions.** All KEGG orthologs  
807 included in the *C. difficile* str. 630 KEGG genome annotation (2015) were included in  
808 this analysis. Read abundances were normalized as previously outlined to sequencing  
809 read length, target gene length, and even total sampling between groups. Also included  
810 are individual enzyme annotation for each KEGG ortholog, as well as the associated  
811 biochemical reaction information extracted from reaction/reaction\_mapformula.lst from  
812 KEGG. Together, KEGG ortholog and enzymatic reaction data were used to reconstruct  
813 the metabolic network of *C. difficile* str. 630 in presented analyses.

814 **Supplementary Table 3 | Topology metrics for enzyme and metabolite nodes in**  
815 **the *C. difficile* str. 630 metabolic network.** Topology analysis of the metabolic  
816 network assembled for this study was performed in the absence of transcriptomic data  
817 to assess quality of *de novo* assembled network in its reflection of known bacterial  
818 metabolism patterns. Enzyme and metabolite node analysis are presented on separate  
819 tabs. Centrality metrics and brief explanations are as follows: Degree is the total number  
820 of connections for a given node (both incoming and outgoing), Betweenness is the  
821 number of shortest paths connecting all other nodes pairs that pass through the node of

822 interest, and Closeness is the inverse sum of shortest path length that pass through the  
823 node of interest. Combined these calculation inform how strongly connected a node is  
824 and how vital it is too overall network structure.

825 **Supplementary Table 4 | Metabolites with significant importance scores for *C.***  
826 ***difficile* in each colonized condition.** Each tab represents those metabolites found to  
827 exceed the significance cutoffs for *C. difficile* str. 630 after colonization of each of the  
828 respective susceptible states. These threshold were set for each metabolite  
829 independently through Monte Carlo simulation as outlined by Figure 3C. A  $p$ -value of  $<$   
830 0.05 corresponded to a metabolite scoring outside of the 95% confidence interval in the  
831 random distribution, and  $p < 0.01$  corresponds to those outside the 99% confidence  
832 interval. Confidence interval calculations for non-normal distributions were performed as  
833 defined by (52).

834 **Supplementary Table 5 | *In vitro* growth analysis for *C. difficile* 630 with carbon**  
835 **sources identified by metabolic network algorithm.** Analysis of growth on important  
836 carbon sources to identify possible differences in utilization efficiency.

837 **References**

- 838 1. **Lessa, F. C., C. V. Gould, and L. C. McDonald.** 2012. Current status of *Clostridium*  
839 *difficile* infection epidemiology. *Clinical infectious diseases : an official publication of the*  
840 *Infectious Diseases Society of America* **55 Suppl 2**:S65–70.
- 841 2. **Lessa, F. C., Y. Mu, W. M. Bamberg, Z. G. Beldavs, G. K. Dumyati, J. R. Dunn, M.**  
842 **M. Farley, S. M. Holzbauer, J. I. Meek, E. C. Phipps, L. E. Wilson, L. G. Winston, J.**  
843 **a Cohen, B. M. Limbago, S. K. Fridkin, D. N. Gerding, and L. C. McDonald.** 2015.  
844 Burden of *Clostridium difficile* Infection in the United States. *The New England Journal*  
845 *of Medicine* **372**:825–834.
- 846 3. **Leffler, D. A., and J. T. Lamont.** 2015. *Clostridium difficile* Infection. *New England*  
847 *Journal of Medicine* **372**:1539–1548.
- 848 4. **Britton, R. A., and V. B. Young.** 2014. Role of the intestinal microbiota in resistance  
849 to colonization by *Clostridium difficile*. *Gastroenterology* **146**:1547–1553.
- 850 5. **Chen, X., K. Katchar, J. D. Goldsmith, N. Nanthakumar, A. Cheknis, D. N.**  
851 **Gerding, and C. P. Kelly.** 2008. A Mouse Model of *Clostridium difficile*-Associated  
852 Disease. *Gastroenterology* **135**:1984–1992.
- 853 6. **Theriot, C. M., M. J. Koenigskecht, P. E. C. Jr, G. E. Hatton, A. M. Nelson, B. Li,**  
854 **G. B. Huffnagle, J. Li, and V. B. Young.** 2014. Antibiotic-induced shifts in the mouse  
855 gut microbiome and metabolome increase susceptibility to *Clostridium difficile* infection.  
856 *Nat Commun* **3114**.



- 857 7. **Schubert, A. M., H. Sinani, and P. D. Schloss.** 2015. Antibiotic-induced alterations  
858 of the murine gut microbiota and subsequent effects on colonization resistance against  
859 *Clostridium difficile*. *mBio* **6**.
- 860 8. **Antunes, L. C. M., J. Han, R. B. R. Ferreira, P. Loli, C. H. Borchers, and B. B.**  
861 **Finlay.** 2011. Effect of antibiotic treatment on the intestinal metabolome. *Antimicrobial*  
862 *Agents and Chemotherapy* **55**:1494–1503.
- 863 9. **Ferreyra, J. A., K. J. Wu, A. J. Hryckowian, D. M. Bouley, B. C. Weimer, and J. L.**  
864 **Sonnenburg.** 2014. Gut microbiota-produced succinate promotes *Clostridium difficile*  
865 infection after antibiotic treatment or motility disturbance. *Cell Host and Microbe*  
866 **16**:770–777.
- 867 10. **Jump, R. L. P., A. Polinkovsky, K. Hurless, B. Sitzlar, K. Eckart, M. Tomas, A.**  
868 **Deshpande, M. M. Nerandzic, and C. J. Donskey.** 2014. Metabolomics analysis  
869 identifies intestinal microbiota-derived biomarkers of colonization resistance in  
870 clindamycin-treated mice. *PLoS ONE* **9**.
- 871 11. **Freter, R., H. Brickner, M. Botney, D. Cleven, and A. Aranki.** 1983. Mechanisms  
872 that control bacterial populations in continuous-flow culture models of mouse large  
873 intestinal flora. *Infection and Immunity* **39**:676–685.
- 874 12. **Wilson, K. H., and F. Perini.** 1988. Role of competition for nutrients in suppression  
875 of *Clostridium difficile* by the colonic microflora. *Infection and Immunity* **56**:2610–2614.
- 876 13. **Sebaihia, M., B. W. Wren, P. Mullany, N. F. Fairweather, N. Minton, R. Stabler,**  
877 **N. R. Thomson, A. P. Roberts, A. M. Cerdeño-Tárraga, H. Wang, M. T. G. Holden,**  
878 **A. Wright, C. Churcher, M. a Quail, S. Baker, N. Bason, K. Brooks, T.**

- 879 **Chillingworth, A. Cronin, P. Davis, L. Dowd, A. Fraser, T. Feltwell, Z. Hance, S.**  
880 **Holroyd, K. Jagels, S. Moule, K. Mungall, C. Price, E. Rabinowitsch, S. Sharp, M.**  
881 **Simmonds, K. Stevens, L. Unwin, S. Whithead, B. Dupuy, G. Dougan, B. Barrell,**  
882 **and J. Parkhill.** 2006. The multidrug-resistant human pathogen *Clostridium difficile* has  
883 a highly mobile, mosaic genome. *Nature genetics* **38**:779–786.
- 884 14. **Kansau, I., A. Barketi-Klai, M. Monot, S. Hoys, B. Dupuy, C. Janoir, and A.**  
885 **Collignon.** 2016. Deciphering adaptation strategies of the epidemic *Clostridium difficile*  
886 027 strain during infection through in vivo transcriptional analysis. *PLoS ONE* **11**.
- 887 15. **Songer, J. G., and M. A. Anderson.** 2006. *Clostridium difficile*: An important  
888 pathogen of food animals. *Anaerobe* **12**:1–4.
- 889 16. **Janvilisri, T., J. Scaria, A. D. Thompson, A. Nicholson, B. M. Limbago, L. G.**  
890 **Arroyo, J. G. Songer, Y. T. Gröhn, and Y. F. Chang.** 2009. Microarray identification of  
891 *Clostridium difficile* core components and divergent regions associated with host origin.  
892 *Journal of Bacteriology* **191**:3881–3891.
- 893 17. **Gripp, E., D. Hlahla, X. Didelot, F. Kops, S. Maurischat, K. Tedin, T. Alter, L.**  
894 **Ellerbroek, K. Schreiber, D. Schomburg, T. Janssen, P. Bartholomäus, D.**  
895 **Hofreuter, S. Woltemate, M. Uhr, B. Brenneke, P. Grüning, G. Gerlach, L. Wieler, S.**  
896 **Suerbaum, and C. Josenhans.** 2011. Closely related *Campylobacter jejuni* strains from  
897 different sources reveal a generalist rather than a specialist lifestyle. *BMC Genomics*  
898 **12**:584.

- 899 18. **Neumann-Schaal, M., J. D. Hofmann, S. E. Will, and D. Schomburg.** 2015. Time-  
900 resolved amino acid uptake of *Clostridium difficile* 630 Delta-erm and concomitant  
901 fermentation product and toxin formation. *BMC Microbiology* 281.
- 902 19. **Nawrocki, K. L., A. N. Edwards, N. Daou, L. Bouillaut, and S. M. McBride.** 2016.  
903 CodY-dependent regulation of sporulation in *Clostridium difficile*. *Journal of Bacteriology*  
904 **198**:2113–2130.
- 905 20. **Dineen, S. S., S. M. McBride, and A. L. Sonenshein.** 2010. Integration of  
906 Metabolism and Virulence by *Clostridium difficile* CodY. *Journal of Bacteriology*  
907 **192**:5350–5362.
- 908 21. **Janoir, C., C. Denève, S. Bouttier, F. Barbut, S. Hoys, L. Caleechum, D.**  
909 **Chapetón-Montes, F. C. Pereira, A. O. Henriques, A. Collignon, M. Monot, and B.**  
910 **Dupuy.** 2013. Adaptive strategies and pathogenesis of *Clostridium difficile* from *in vivo*  
911 transcriptomics. *Infection and Immunity* **81**:3757–3769.
- 912 22. **Matamouros, S., P. England, and B. Dupuy.** 2007. *Clostridium difficile* toxin  
913 expression is inhibited by the novel regulator TcdC. *Molecular Microbiology* **64**:1274–  
914 1288.
- 915 23. **Antunes, A., I. Martin-Verstraete, and B. Dupuy.** 2011. CcpA-mediated repression  
916 of *Clostridium difficile* toxin gene expression. *Molecular Microbiology* **79**:882–899.
- 917 24. **Theriot, C. M., C. C. Koumpouras, P. E. Carlson, I. I. Bergin, D. M. Aronoff, and**  
918 **V. B. Young.** 2011. Cefoperazone-treated mice as an experimental platform to assess  
919 differential virulence of *Clostridium difficile* strains. *Gut microbes* **2**:326–334.

- 920 25. **Monot, M., C. Boursaux-Eude, M. Thibonnier, D. Vallenet, I. Moszer, C.**  
921 **Medigue, I. Martin-Verstraete, and B. Dupuy.** 2011. Reannotation of the genome  
922 sequence of *Clostridium difficile* strain 630. *Journal of Medical Microbiology* **60**:1193–  
923 1199.
- 924 26. **Koenigsknecht, M. J., C. M. Theriot, I. L. Bergin, C. A. Schumacher, P. D.**  
925 **Schloss, and V. B. Young.** 2015. Dynamics and establishment of *Clostridium difficile*  
926 infection in the murine gastrointestinal tract. *Infection and Immunity* **83**:934–941.
- 927 27. **Metcalf, D., S. Sharif, and J. Weese.** 2010. Evaluation of candidate reference  
928 genes in *Clostridium difficile* for gene expression normalization. *Anaerobe* **16**:439–443.
- 929 28. **Gendron, N., H. Putzer, and M. Grunberg-Manago.** 1994. Expression of both  
930 *Bacillus subtilis* threonyl-tRNA synthetase genes is autogenously regulated. *Journal of*  
931 *Bacteriology* **176**:486–494.
- 932 29. **Sjögren, L., and A. Clarke.** 2011. Assembly of the Chloroplast ATP-Dependent Clp  
933 Protease in *Arabidopsis* Is Regulated by the ClpT Accessory Proteins. *The Plant Cell*  
934 **23**:322–332.
- 935 30. **Jackson, S., M. Calos, A. Myers, and W. T. Self.** 2006. Analysis of proline  
936 reduction in the nosocomial pathogen *Clostridium difficile*. *Journal of Bacteriology*  
937 **188**:8487–8495.
- 938 31. **Potapov, A. P., N. Voss, N. Sasse, and E. Wingender.** 2005. Topology of  
939 mammalian transcription networks. *Genome informatics. International Conference on*  
940 *Genome Informatics* **16**:270–278.

- 941 32. **Koschutzki, D.**, and **F. Schreiber**. 2008. Centrality analysis methods for biological  
942 networks and their application to gene regulatory networks. *Gene Regulation and*  
943 *Systems Biology* **2008**:193–201.
- 944 33. **Ma, H. W.**, and **A. P. Zeng**. 2003. The connectivity structure, giant strong  
945 component and centrality of metabolic networks. *Bioinformatics* **19**:1423–1430.
- 946 34. **Patil, K. R.**, and **J. Nielsen**. 2005. Uncovering transcriptional regulation of  
947 metabolism by using metabolic network topology. *Proceedings of the National Academy*  
948 *of Sciences of the United States of America* **102**:2685–9.
- 949 35. **Karasawa, T.**, **S. Ikoma**, **K. Yamakawa**, and **S. Nakamura**. 1995. A defined growth  
950 medium for *Clostridium difficile*. *Microbiology* **141**:371–375.
- 951 36. **Abounaga, H.**, **O. Pinkenburg**, **J. Schiffels**, **A. El-Refai**, **W. Buckel**, and **T.**  
952 **Selmer**. 2013. Effect of an oxygen-tolerant bifurcating butyryl coenzyme a  
953 dehydrogenase/electron-transferring flavoprotein complex from *Clostridium difficile* on  
954 butyrate production in *Escherichia coli*. *Journal of Bacteriology* **195**:3704–3713.
- 955 37. **Fuller, M. F.**, and **P. J. Reeds**. 1998. Nitrogen cycling in the gut. *Annual review of*  
956 *nutrition* **18**:385–411.
- 957 38. **Marcobal, A.**, **A. M. Southwick**, **K. A. Earle**, and **J. L. Sonnenburg**. 2013. A  
958 refined palate: Bacterial consumption of host glycans in the gut. *Glycobiology* **23**:1038–  
959 1046.
- 960 39. **Köpke, M.**, **M. Straub**, and **P. Dürre**. 2013. *Clostridium difficile* Is an Autotrophic  
961 Bacterial Pathogen. *PLoS ONE* **8**.

- 962 40. **Green, M. L., and P. D. Karp.** 2006. The outcomes of pathway database  
963 computations depend on pathway ontology. *Nucleic Acids Research* **34**:3687–3697.
- 964 41. **Wilson, K. H., M. J. Kennedy, and F. R. Fekety.** 1982. Use of sodium taurocholate  
965 to enhance spore recovery on a medium selective for *Clostridium difficile*. *Journal of*  
966 *Clinical Microbiology* **15**:443–446.
- 967 42. **Sorg, J. a., and A. L. Sonenshein.** 2010. Inhibiting the initiation of *Clostridium*  
968 *difficile* spore germination using analogs of chenodeoxycholic acid, a bile acid. *Journal*  
969 *of Bacteriology* **192**:4983–4990.
- 970 43. **Leslie, J. L., S. Huang, J. S. Opp, M. S. Nagy, M. Kobayashi, V. B. Young, and J.**  
971 **R. Spence.** 2015. Persistence and toxin production by *Clostridium difficile* within human  
972 intestinal organoids result in disruption of epithelial paracellular barrier function.  
973 *Infection and Immunity* **83**:138–145.
- 974 44. **Kozich, J., S. Westcott, N. Baxter, S. Highlander, and P. Schloss.** 2013.  
975 Development of a dual-index sequencing strategy and curation pipeline for analyzing  
976 amplicon sequence data on the MiSeq Illumina sequencing platform. *Appl Environ*  
977 *Microbiol* **79**:5112–5120.
- 978 45. **Wang, Q., G. M. Garrity, J. M. Tiedje, and J. R. Cole.** 2007. Naive Bayesian  
979 classifier for rapid assignment of rRNA sequences into the new bacterial taxonomy.  
980 *Applied and Environmental Microbiology* **73**:5261–5267.
- 981 46. **Lopez-Medina, E., M. M. Neubauer, G. B. Pier, and A. Y. Koh.** 2011. RNA  
982 isolation of *Pseudomonas aeruginosa* colonizing the murine gastrointestinal tract.  
983 *Journal of visualized experiments* : JoVE 6–9.

- 984 47. **Martin, M. J., S. Clare, D. Goulding, A. Faulds-Pain, L. Barquist, H. P. Browne,**  
985 **L. Pettit, G. Dougan, T. D. Lawley, and B. W. Wren.** 2013. The *agr* locus regulates  
986 virulence and colonization genes in *Clostridium difficile* 027. *Journal of Bacteriology*  
987 **195**:3672–3681.
- 988 48. **Langmead, B., C. Trapnell, M. Pop, and S. L. Salzberg.** 2009. Ultrafast and  
989 memory-efficient alignment of short DNA sequences to the human genome. *Genome*  
990 *Biol* 1–10.
- 991 49. **Ogata, H., S. Goto, K. Sato, W. Fujibuchi, H. Bono, and M. Kanehisa.** 1999.  
992 KEGG: Kyoto encyclopedia of genes and genomes. *Nucleic Acids Research* **27**:29–34.
- 993 50. **Li, H., B. Handsaker, A. Wysoker, T. Fennell, J. Ruan, N. Homer, G. Marth, G.**  
994 **Abecasis, and R. Durbin.** 2009. The Sequence Alignment/Map format and SAMtools.  
995 *Bioinformatics* **25**:2078–2079.
- 996 51. **Basler, G., O. Ebenhöf, J. Selbig, and Z. Nikoloski.** 2011. Mass-balanced  
997 randomization of metabolic networks. *Bioinformatics* **27**:1397–1403.
- 998 52. **Bonett, D. G., and R. M. Price.** 2002. Statistical inference for a linear function of  
999 medians: confidence intervals, hypothesis testing, and sample size requirements.  
1000 *Psychological methods* **7**:370–383.

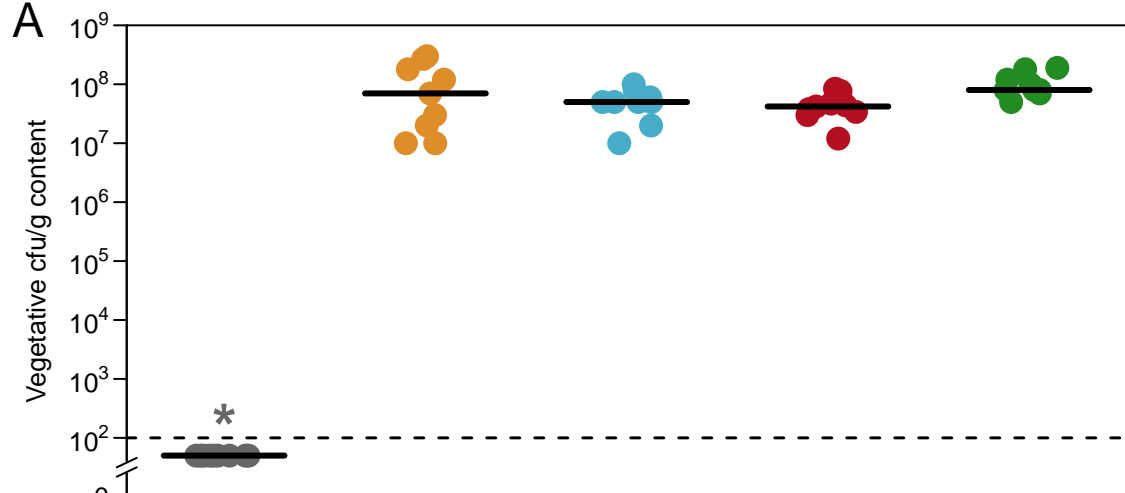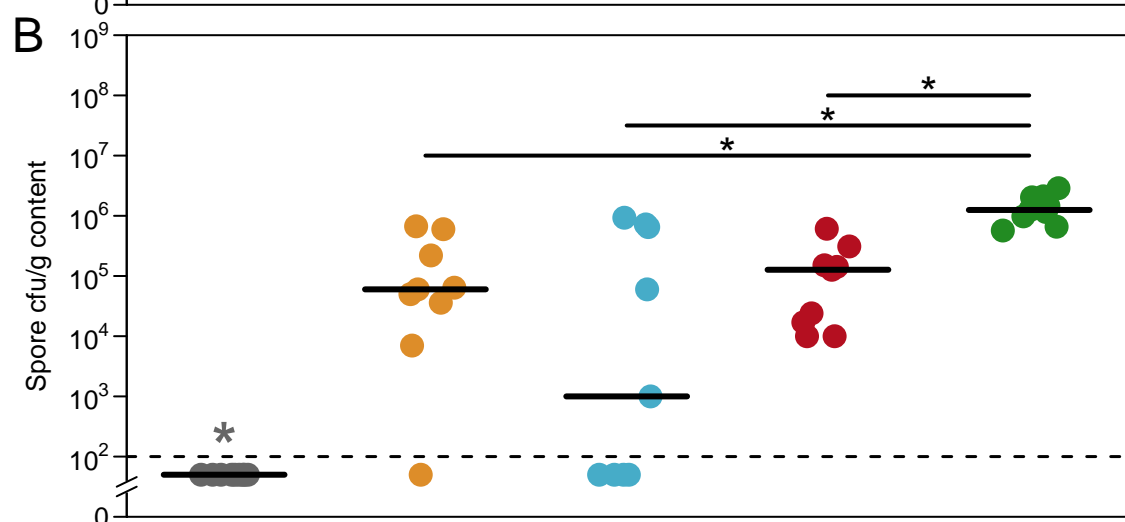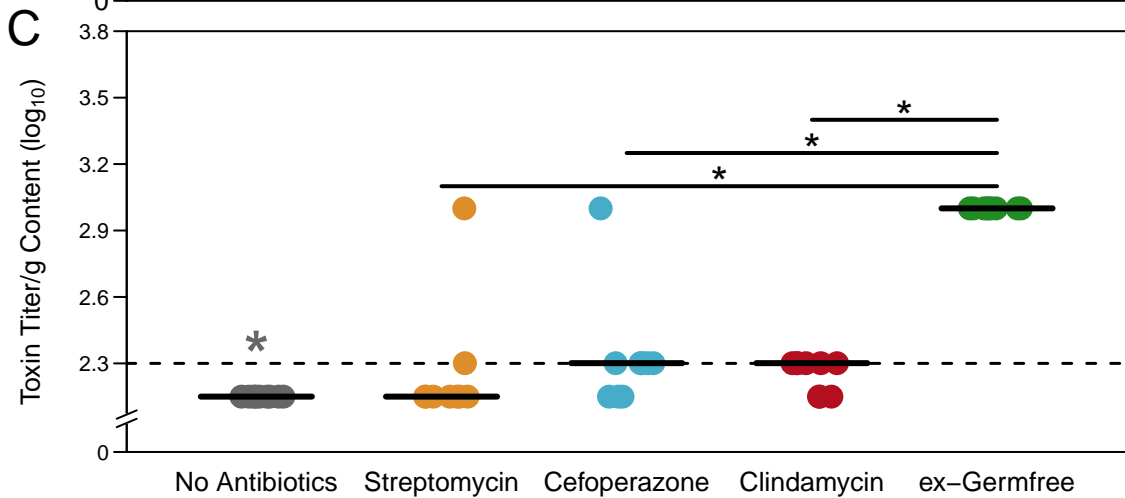

No Antibiotics Streptomycin Cefoperazone Clindamycin ex-Germfree



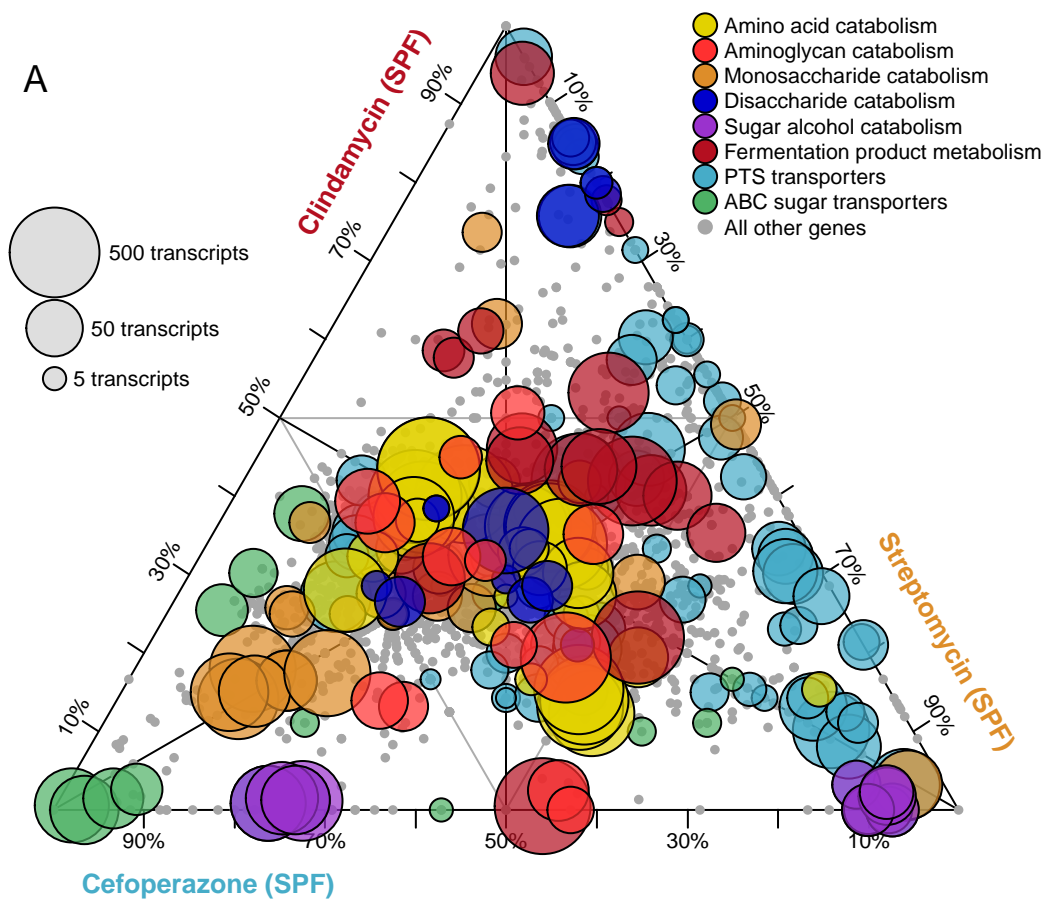

bioRxiv preprint doi: <https://doi.org/10.1101/092304>; this version posted June 1, 2017. The copyright holder for this preprint (which was not certified by peer review) is the author/funder, who has granted bioRxiv a license to display the preprint in perpetuity. It is made available under aCC-BY 4.0 International license.

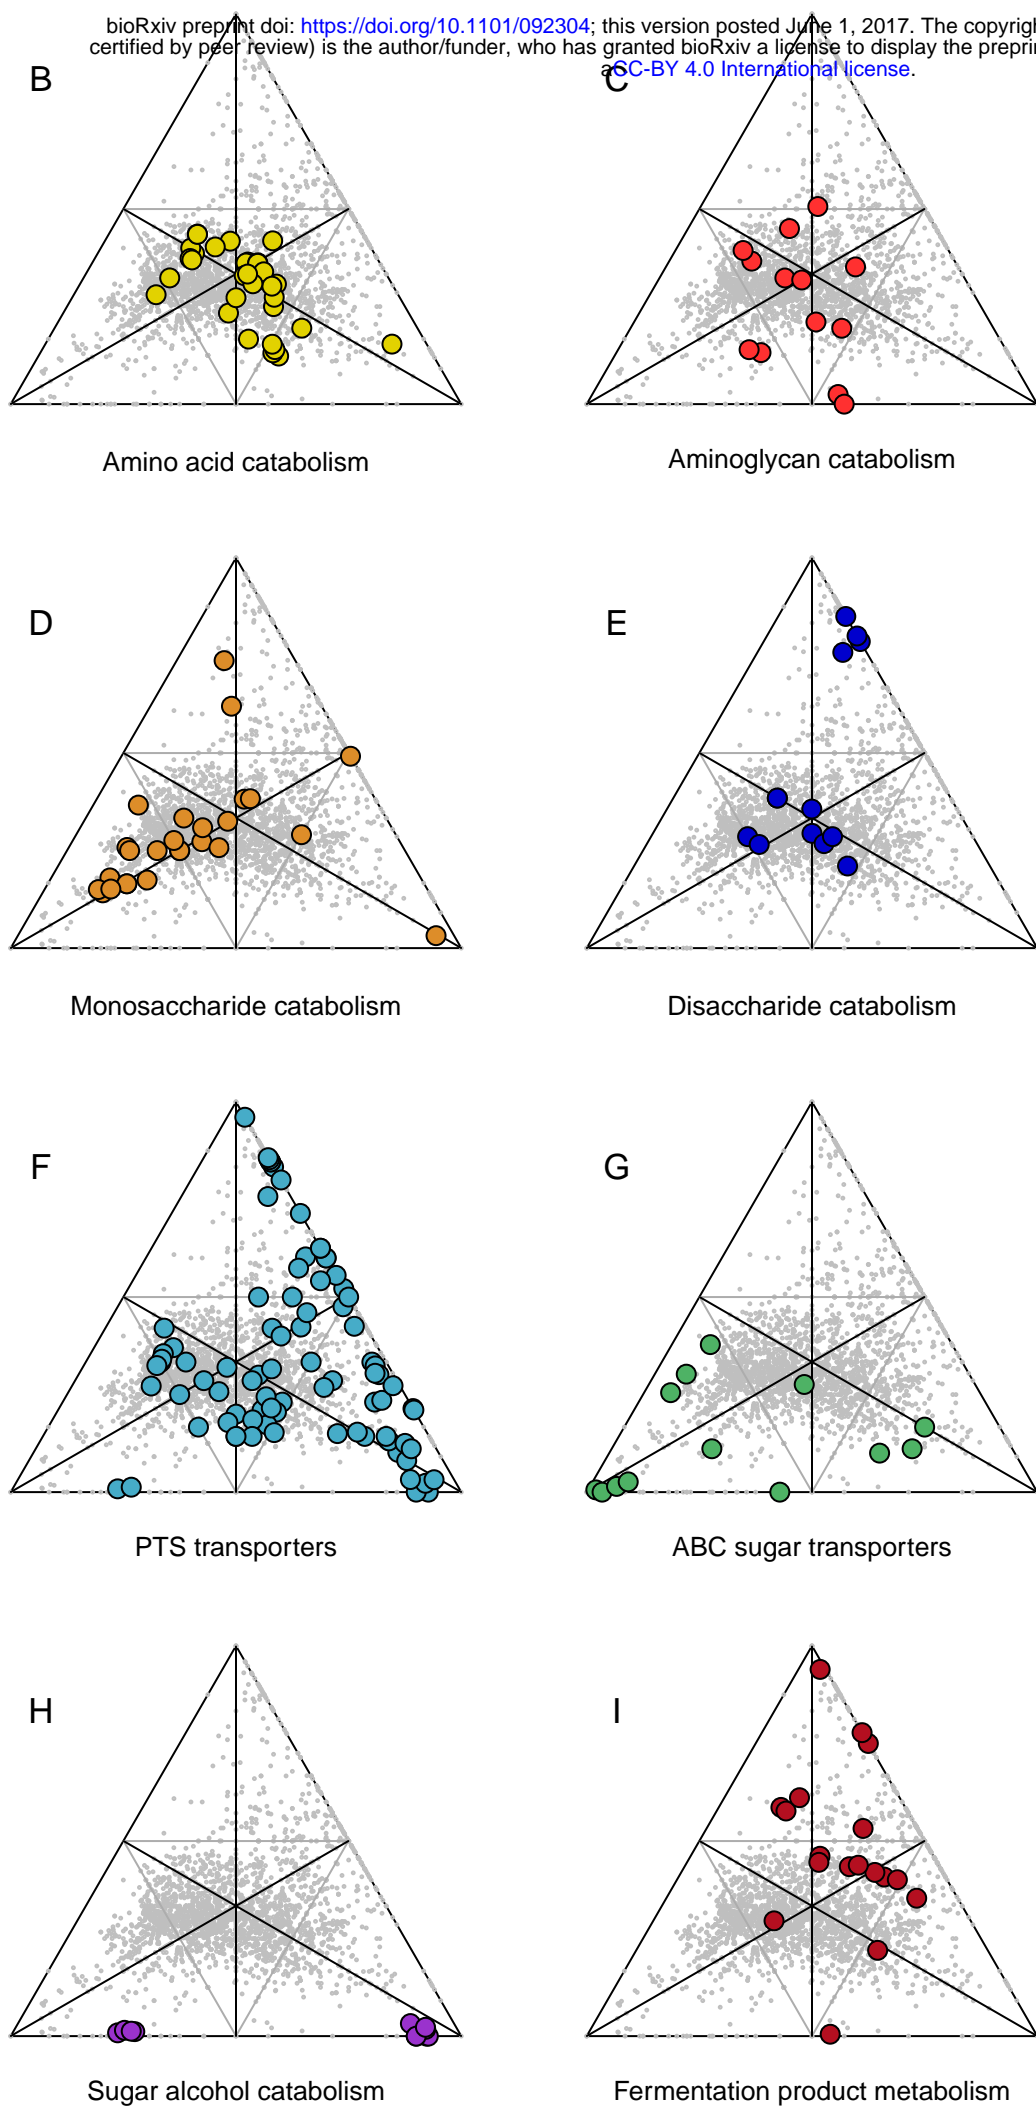

A

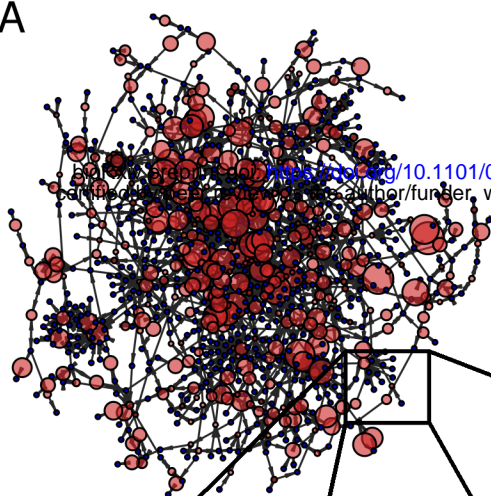

$$\text{(I)} \mu_i = \frac{\sum t_i}{n(e_i)} \quad \text{(II)} \mu_o = \frac{\sum t_o}{n(e_i)}$$

$$\text{(III)} \text{Importance}(m) = \log_2(\mu_i - \mu_o)$$

B

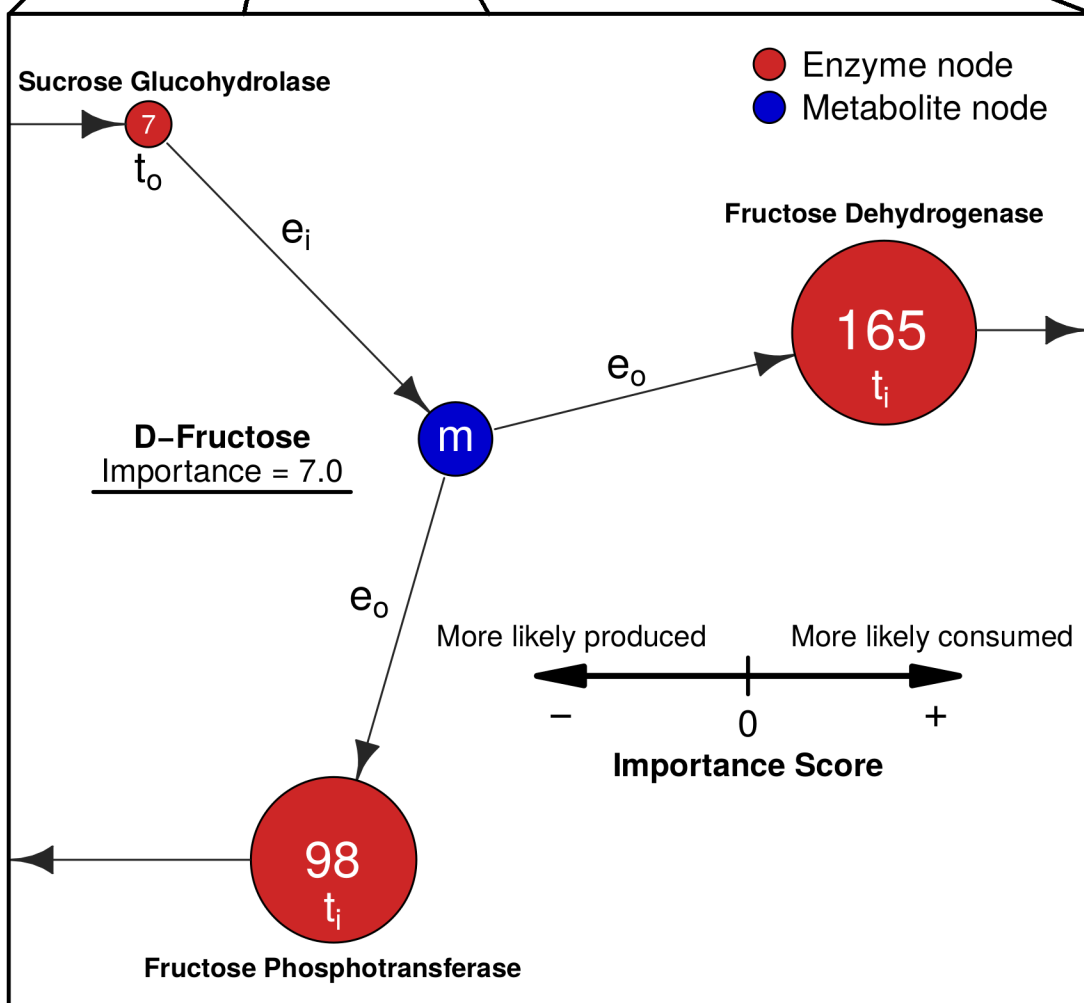

C

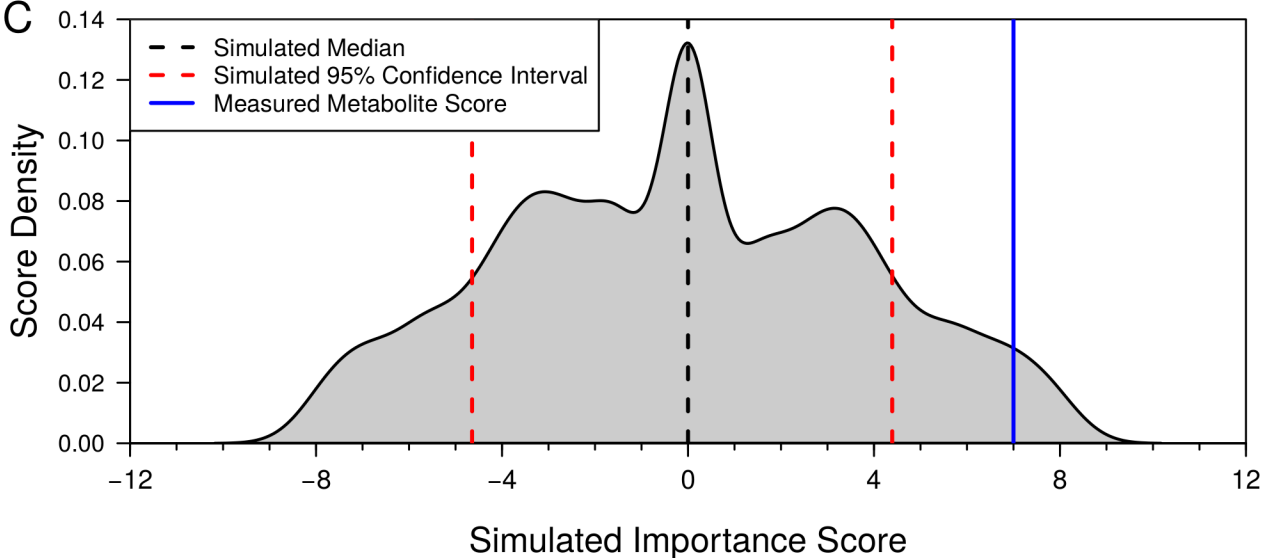

A

## Median Shared Importance

N-Acetylglucosamine

L-Proline

Primary alcohol

Ethanol

CO<sub>2</sub>

Formate

bioRxiv preprint doi: <https://doi.org/10.1101/092304>; this version posted June 1, 2017. The copyright holder for this preprint (which was not certified by peer review) is the author/funder, who has granted bioRxiv a license to display the preprint in perpetuity. It is made available under aCC-BY 4.0 International license.

## Streptomycin-pretreated

D-Sorbitol

Galactitol

(S)-3-Hydroxybutanoyl-CoA

Starch

alpha-Aminopropionitrile

3-Indoleacetonitrile

Benzonitrile

## Cefoperazone-pretreated

Mannitol

HCO<sub>3</sub><sup>-</sup>

dGDP

Nicotinamide - β - riboside

Guanosine

Inosine

## Clindamycin-pretreated

Salicin-6P

L-Alanine

Succinyl-CoA

Dihydrolipoylprotein

## ex-Germfree

Acetate

N-Acetylneuraminate

D-Ribose-5P

Phosphonoacetate

SAICAR

L-Lysine

AMP

D-Glyceraldehyde 3P

L-Leucine

L-Methionine

6-Thioxanthine 5'P

L-Threonine

6-Mercaptopurine

Thioguanine

6-Methylmercaptapurine

2-Hydroxyglutaryl-CoA

3-Methylbenzalpyruvate

4-Hydroxymethylbenzalpyruvate

Perillyl-CoA

3-Carboxybenzalpyruvate

6-Carboxyhex-2-enoyl-CoA

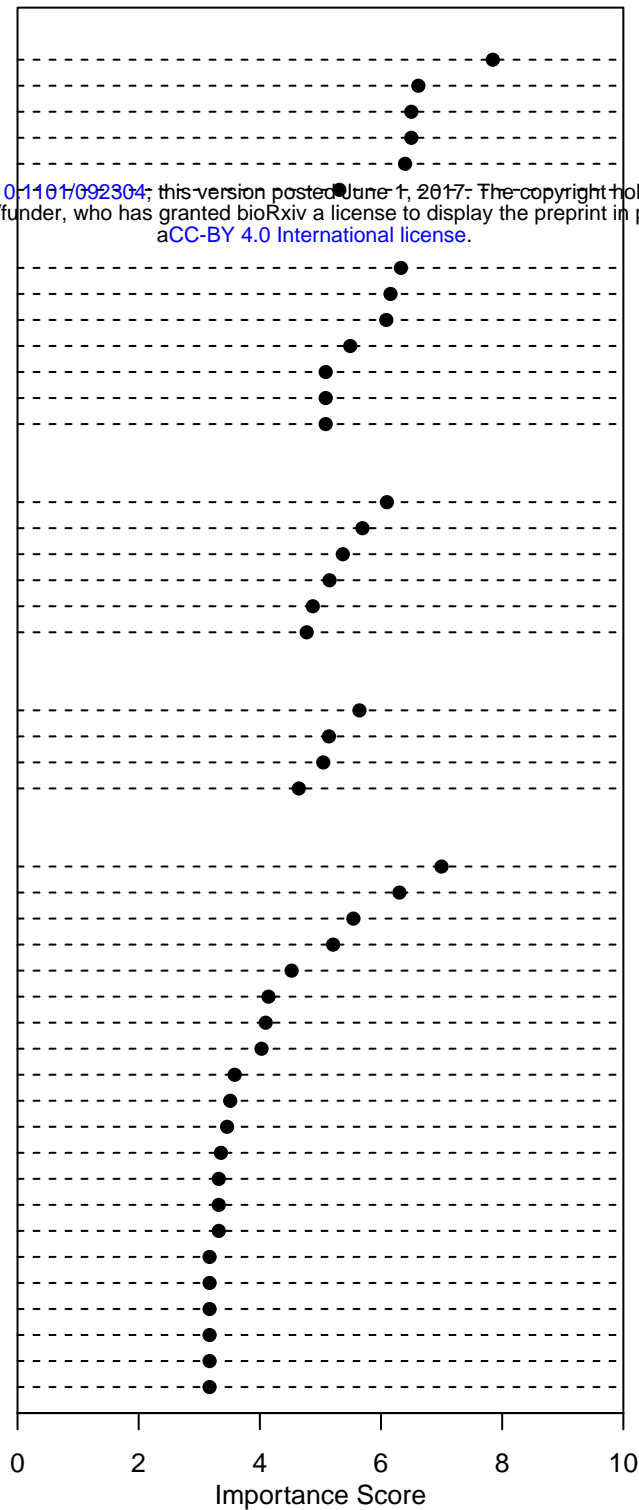

B

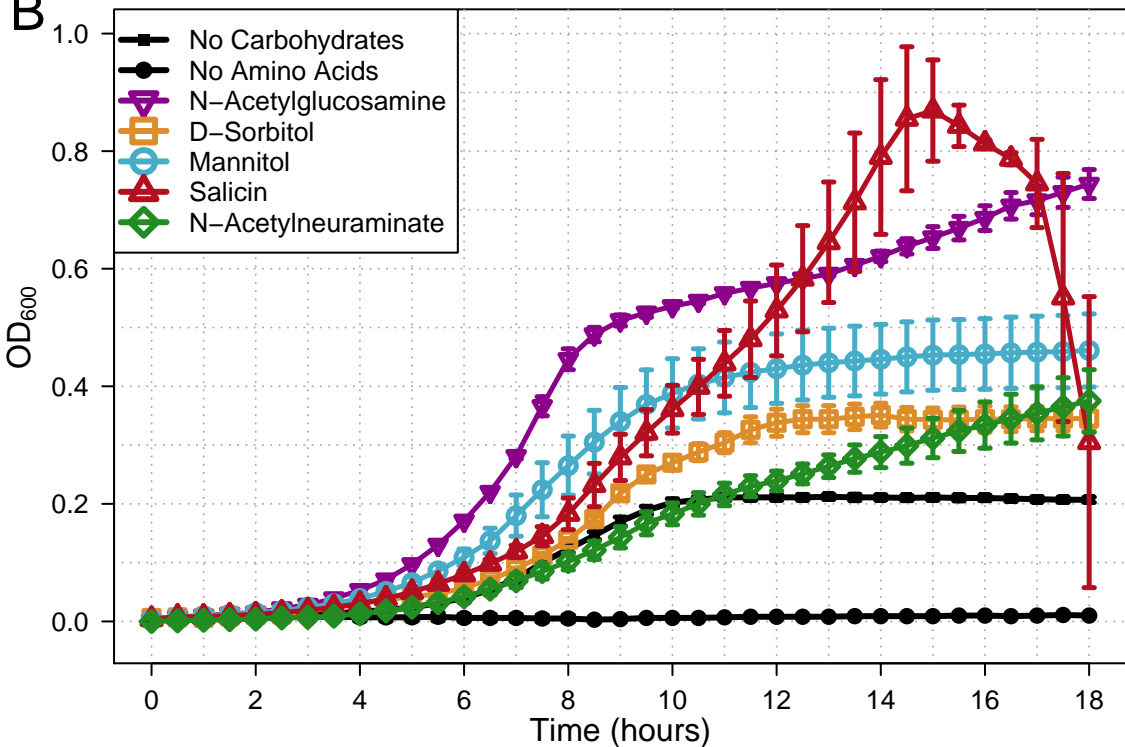

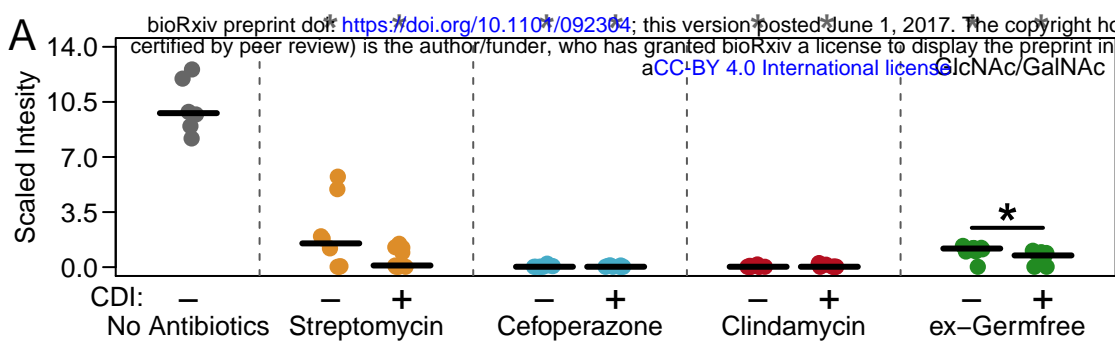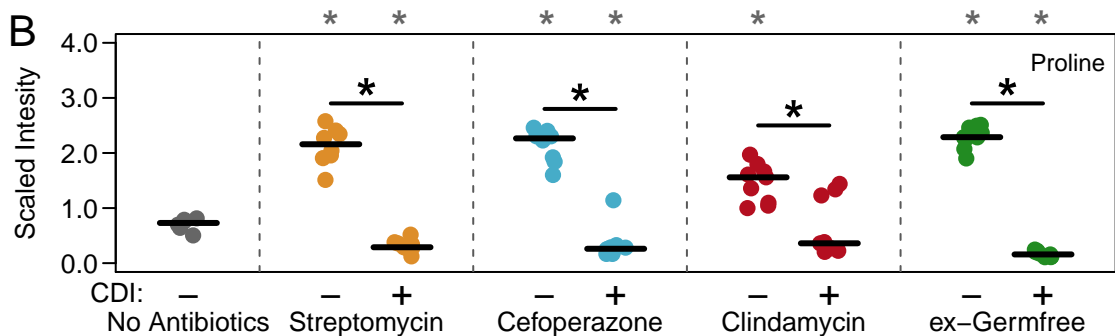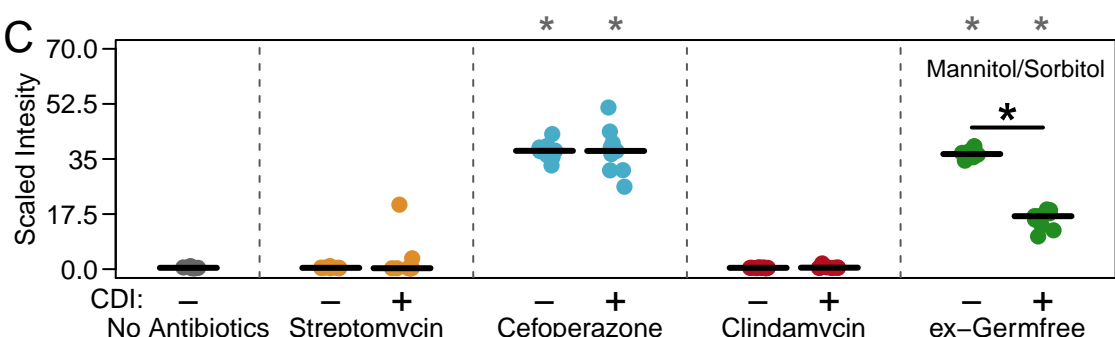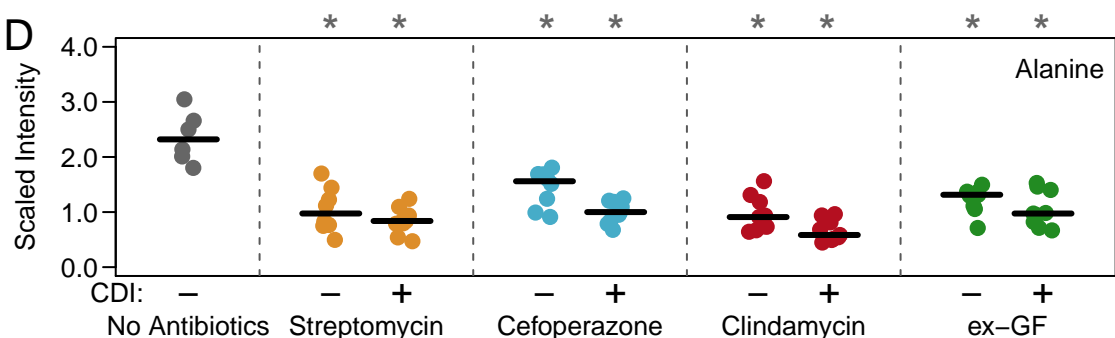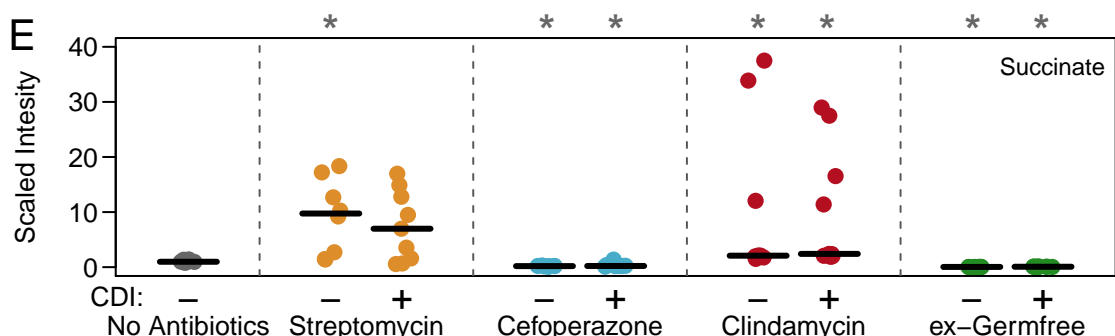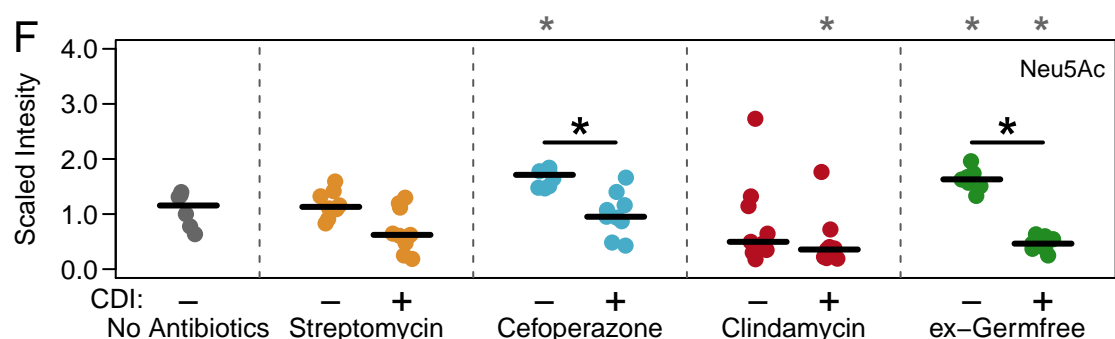

Source: https://www.biorxiv.org/content/10.1101/092304v4.full.pdf
